# Supplementary material
Source: Research Square preprint supplement (doi:10.21203/rs.3.rs-9554856/v1)

**The microbial garden of fungus-growing ants: Distinct lignocellulosic profile and spatial structure, yet a similar microbiota**

Mariana O. Barcoto, Rodrigo H. S. Garcia, Gabriel G. P. Pennachioni, João G. S. Soares, Eduardo R. de Azevedo, Lucas W. Mendes, Alessandra I. Coan, Mauricio Bacci Jr,Andre Rodrigues

**Supplementary material**

**Table S1 -** Sample metadata for microbiota analysis.

| **Species** | **Replicate** | **Colony code** | **Sampling site** | **Lat S / Long W** |
| --- | --- | --- | --- | --- |
| *Atta sexdens* | 1 | MOB231127-01 | Ubatuba, SP, Brazil | 23°20'19.2" / 44°50'17.4" |
| *Atta sexdens* | 2 | RLS231126-04 | Ubatuba, SP, Brazil | 23°20'20.1" / 44°50'17.0" |
| *Atta sexdens* | 3 | MOB230420-02 | Ubatuba, SP, Brazil | 23°21'38.5'' / 44°50'59.4'' |
| *Atta sexdens* | 4 | MOB230420-01 | Ubatuba, SP, Brazil | 23°21'16.7'' / 44°50'52.4'' |
| *Acromyrmex coronatus* | 1 | MOB240114-02 | Itatiaia, RJ, Brazil | 22°27'18.70" / 44°36'29.90" |
| *Acromyrmex coronatus* | 2 | RLS240114-01 | Itatiaia, RJ, Brazil | 22°27'18.70" / 44°36'29.90" |
| *Acromyrmex coronatus* | 3 | RLS240114-03 | Itatiaia, RJ, Brazil | 22°27'4" / 44°36'45" |
| *Mycetomoellerius* sp. | 1 | MOB240115-01 | Itatiaia, RJ, Brazil | 22°27'15.0" / 44°36'24.8" |
| *Mycetomoellerius* sp. | 2 | RLS240115-02 | Itatiaia, RJ, Brazil | 22°27'15.0" / 44°36'24.8" |
| *Mycetomoellerius* sp. | 3 | MOB240114-01 | Itatiaia, RJ, Brazil | 22°27'14.70" / 44°36'25.40" |
| *Mycetophylax* sp. | 1 | PK231125-04 | Ubatuba, SP, Brazil | 23°21'19.7" / 44°46'10.0" |
| *Mycetophylax* sp. | 2 | MOB230419-05 | Ubatuba, SP, Brazil | 23°21'38.5'' / 44°50'59.2'' |
| *Mycetophylax* sp. | 3 | MOB240113-03 | Itatiaia, RJ, Brazil | 22°27'17.0" / 44°36'28.4" |
| *Apterostigma* sp. | 1 | AR240115-01 | Itatiaia, RJ, Brazil | 22°25'09.4" / 44°07'11.4" |
| *Apterostigma* sp. | 2 | AR240113-04 | Itatiaia, RJ, Brazil | 22°27'18.8" / 44°36'30.5" |
| *Apterostigma* sp. | 3 | RAPS240114-03 | Itatiaia, RJ, Brazil | 22°27'06.5" / 44°36'40.4" |
| *Mycocepurus* sp. | 1 | RLS230421-01 | Ubatuba, SP, Brazil | 23°21'40.4'' / 44°50'54.4'' |
| *Mycocepurus* sp. | 2 | MOB230421-03 | Ubatuba, SP, Brazil | 23°21'40.4'' / 44°50'54.4'' |
| *Mycocepurus* sp. | 3 | MOB230421-01 | Ubatuba, SP, Brazil | 23°21'35.1'' / 44°50'54.2'' |

**Fig. S1** - Rarefaction curves of 16S rRNA sequences of distinct garden regions, colored by ant species


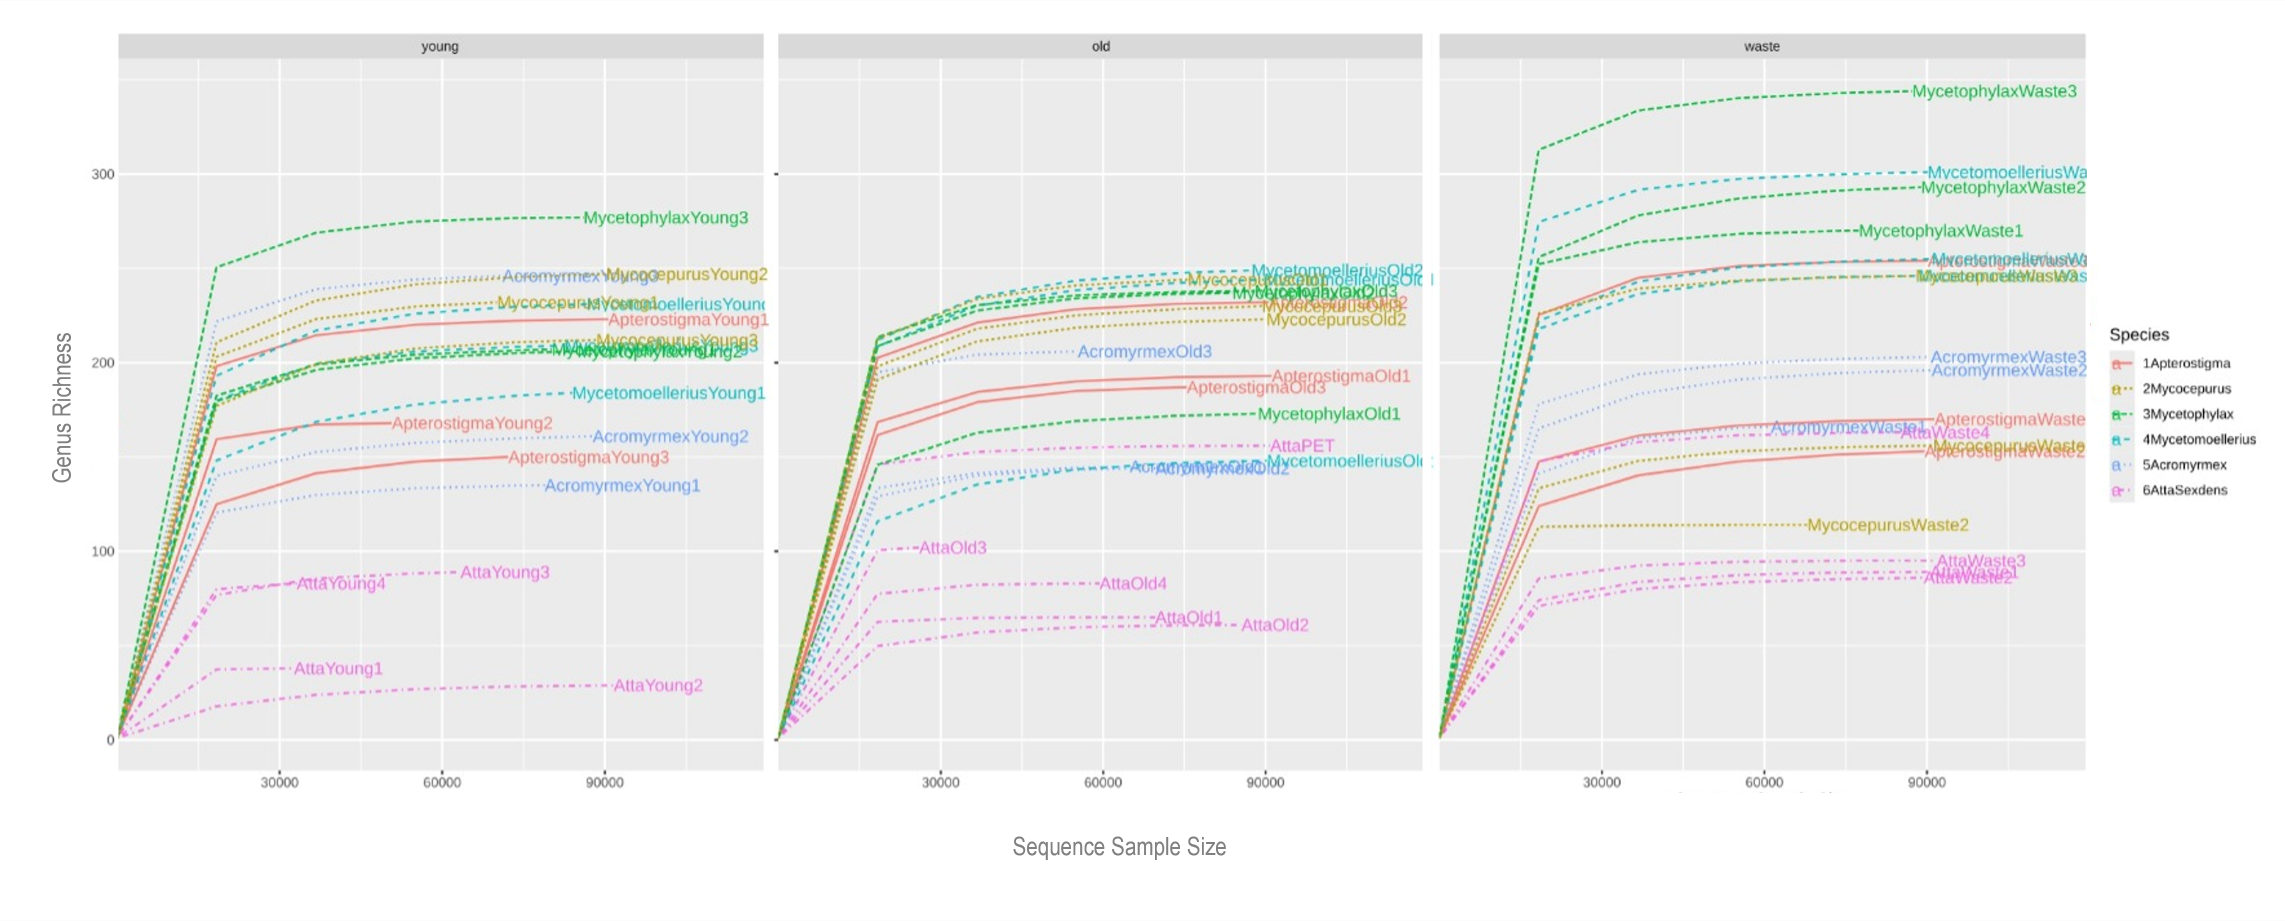


**Fig. S2** - Rarefaction curves of 16S rRNA sequences in distinct ant species, colored by garden region


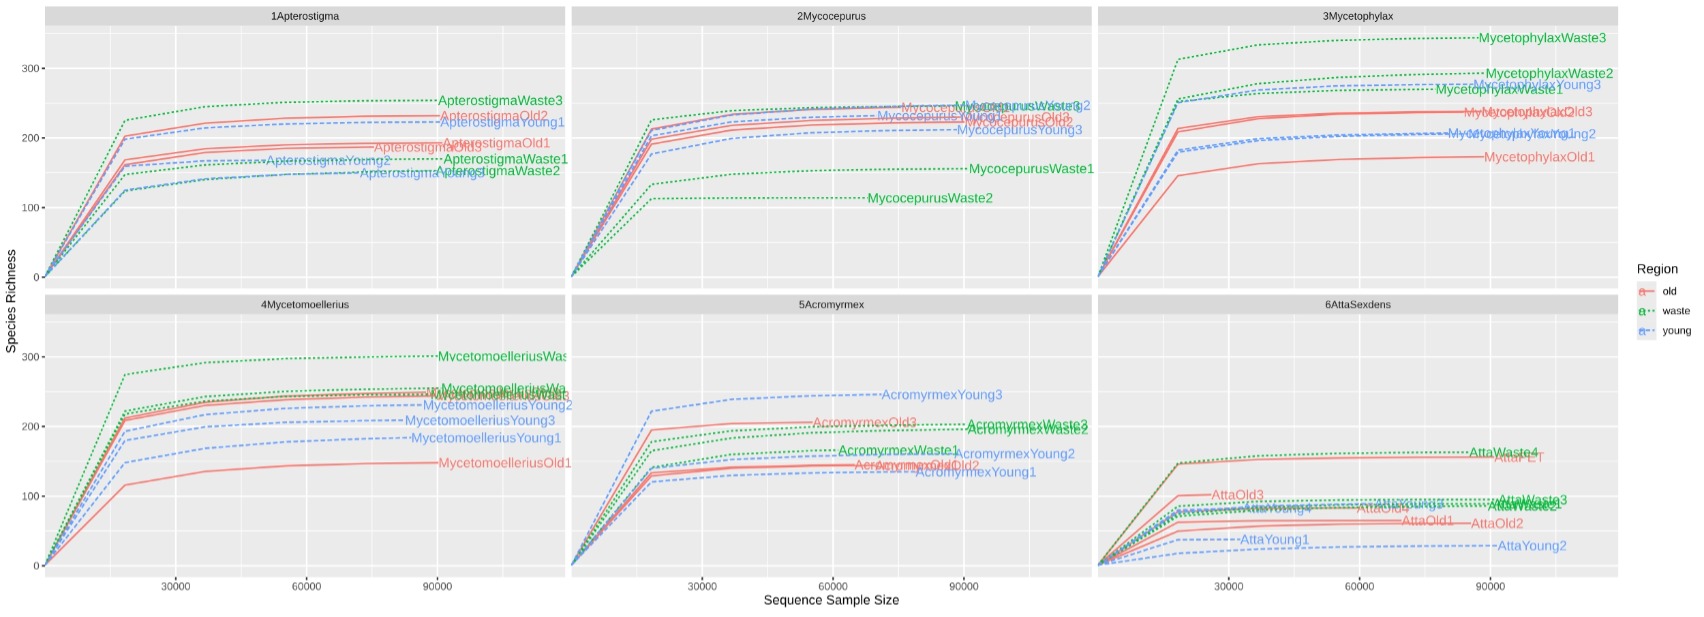


Genus Richness

**Fig. S3** – Bacterial diversity of different garden regions, grouping all fungiculture systems. Alpha-diversity indices were estimated at genus level, based on Observed Features (Richness), Shannon, Simpson, and Fisher. Significant differences were estimated by Mann-Whitney/Kruskal-Wallis, with the Wilcoxon test for post hoc pairwise comparisons. Significant differences between garden regions (Wilcoxon test, FDR-adjusted *p* < 0.05) are indicated by letters (y: young garden; w: waste).


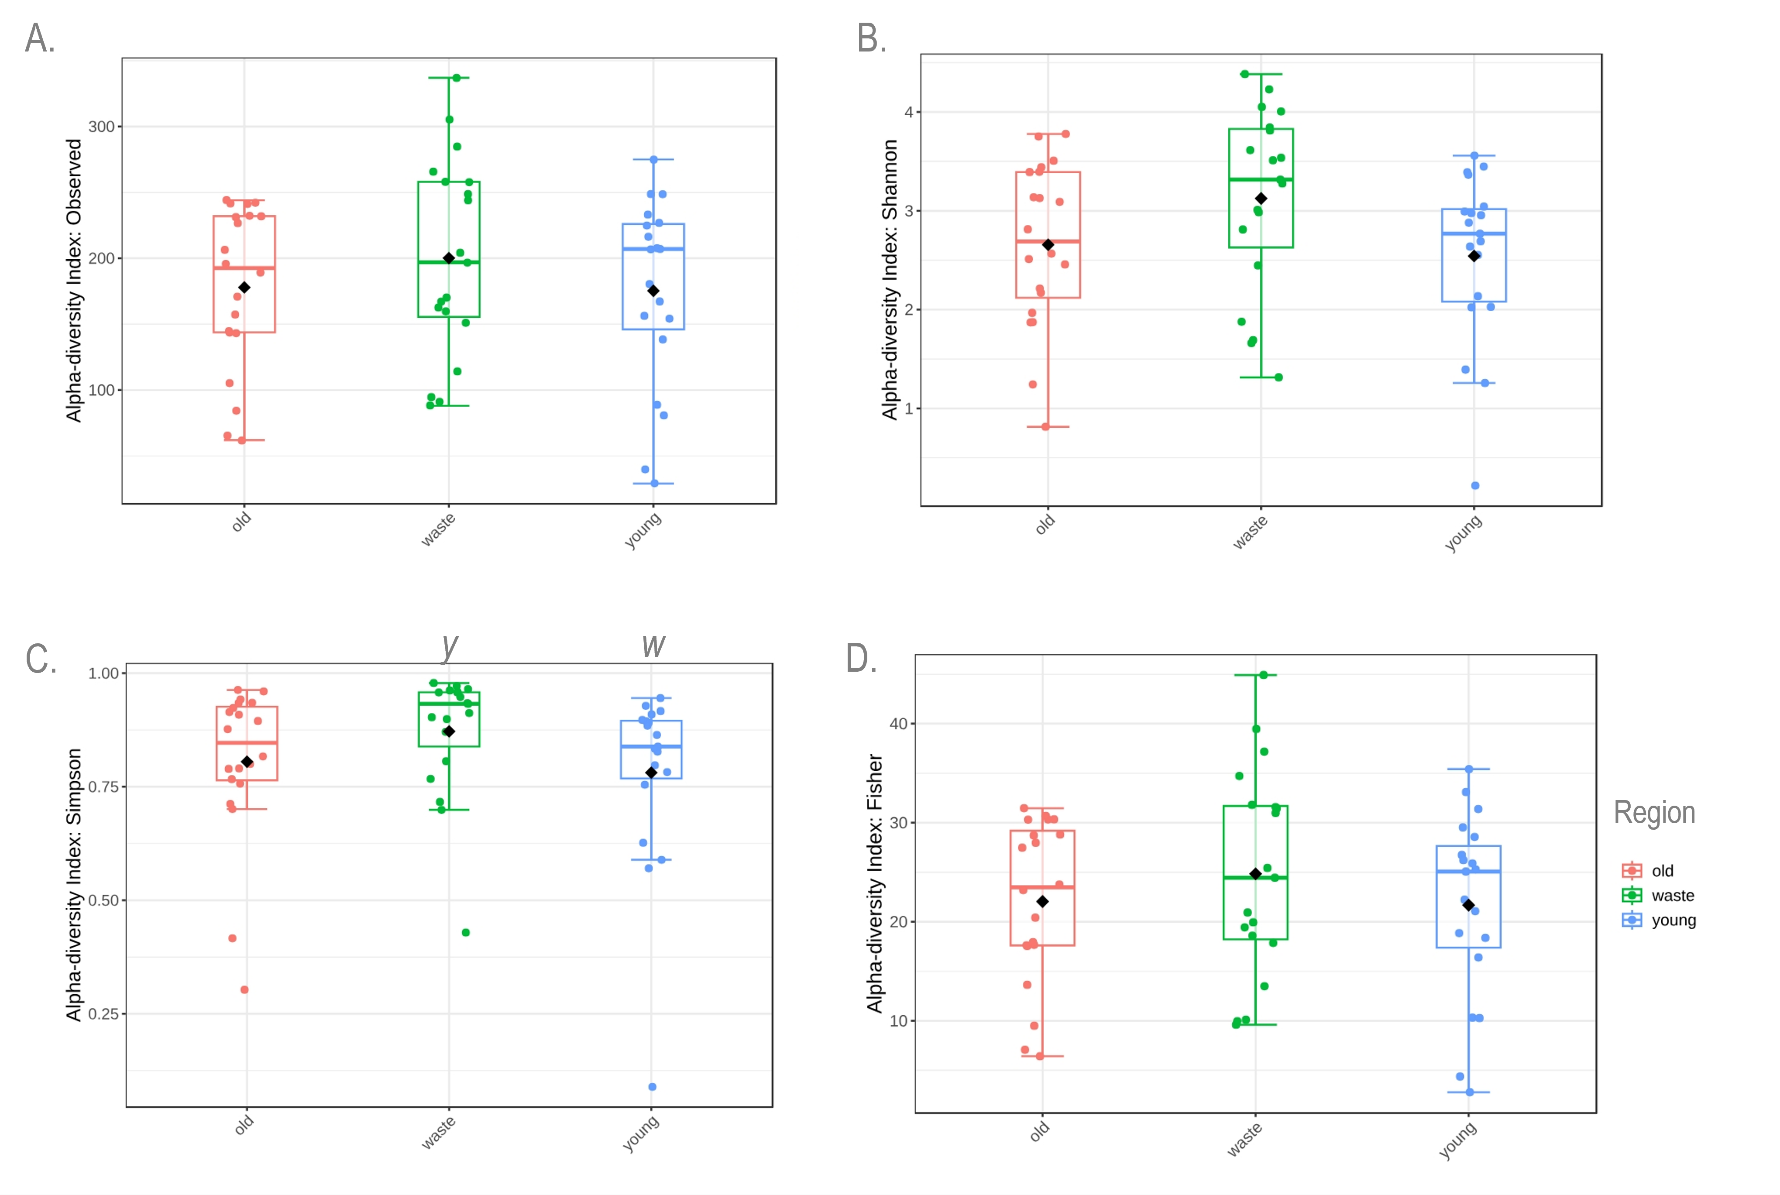


**Fig. S4** - Relative abundance of bacterial phylum in different garden regions, shown for distinct ant species


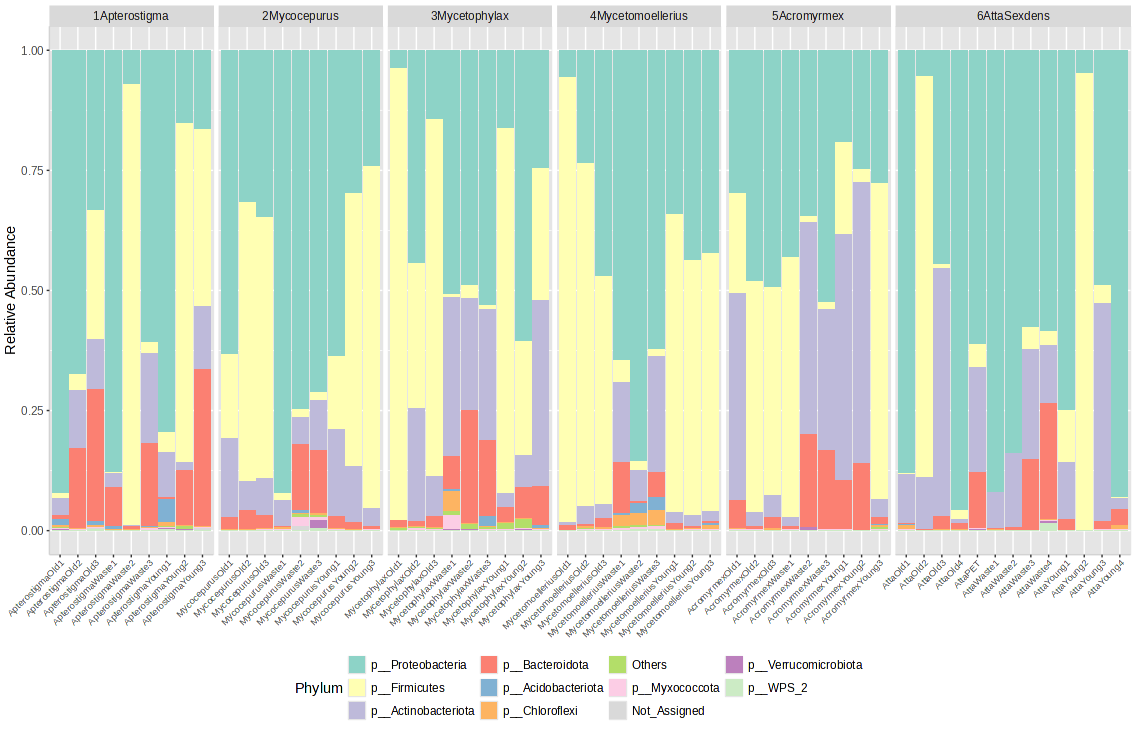


**Fig. S5** – Core microbiota of young gardens defined by the ASV prevalence, compared between ant species


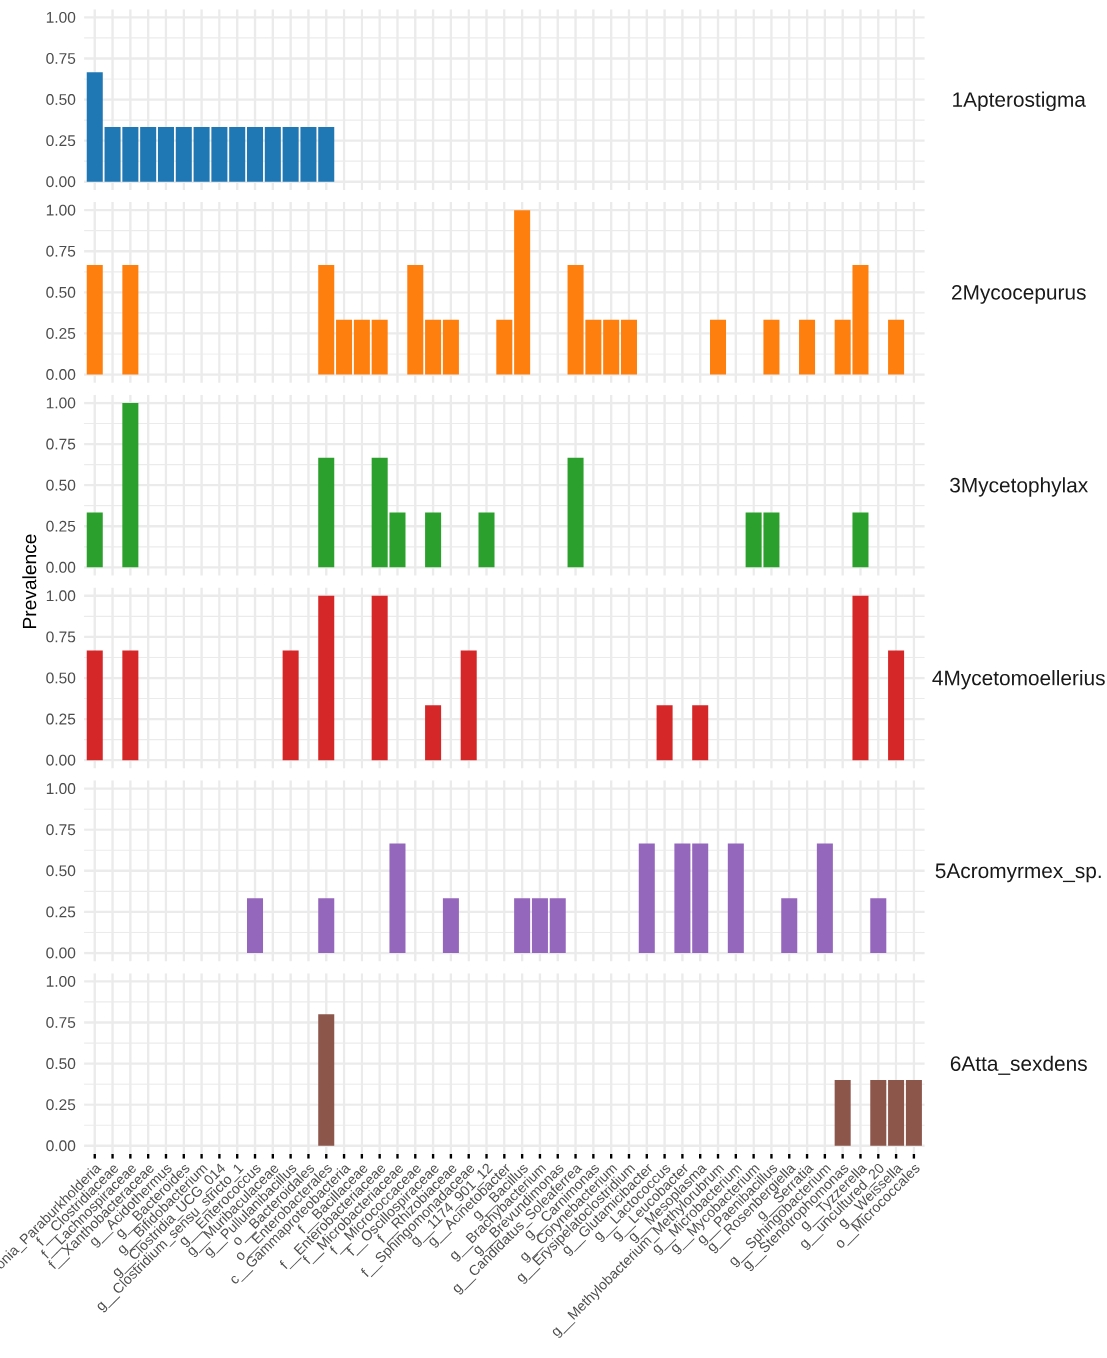


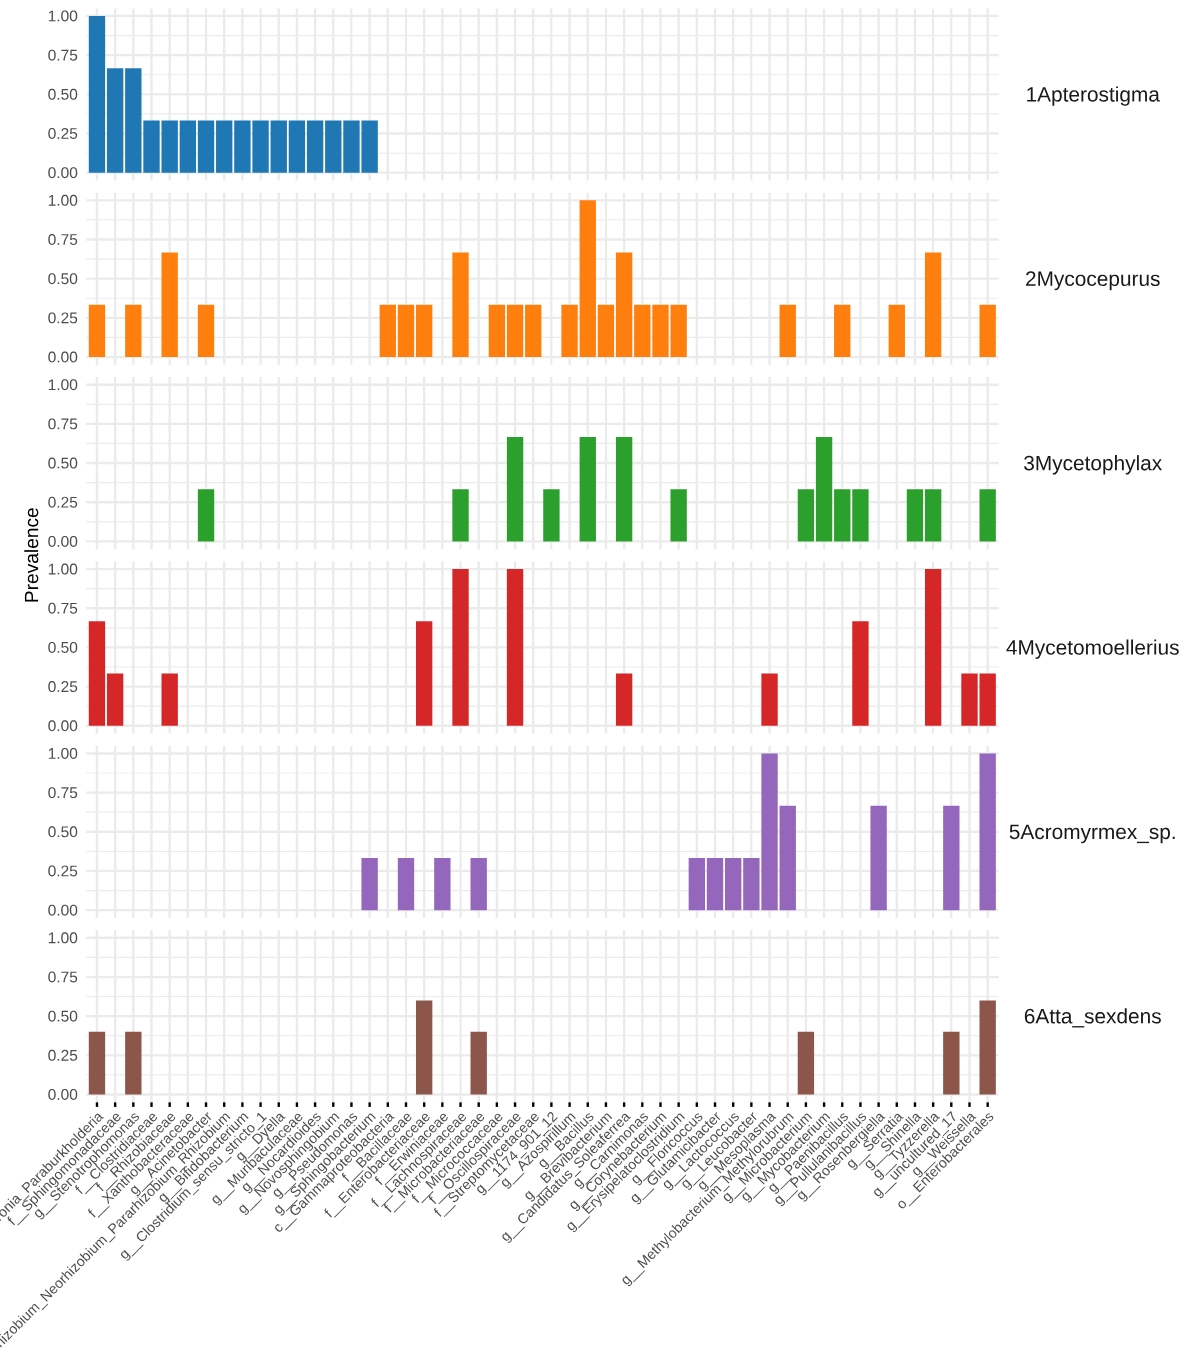
**Fig. S6** – Core microbiota of old gardens defined by the ASV prevalence, compared between ant species

**Fig. S7** – Core microbiota of waste samples defined by the ASV prevalence, compared between ant species


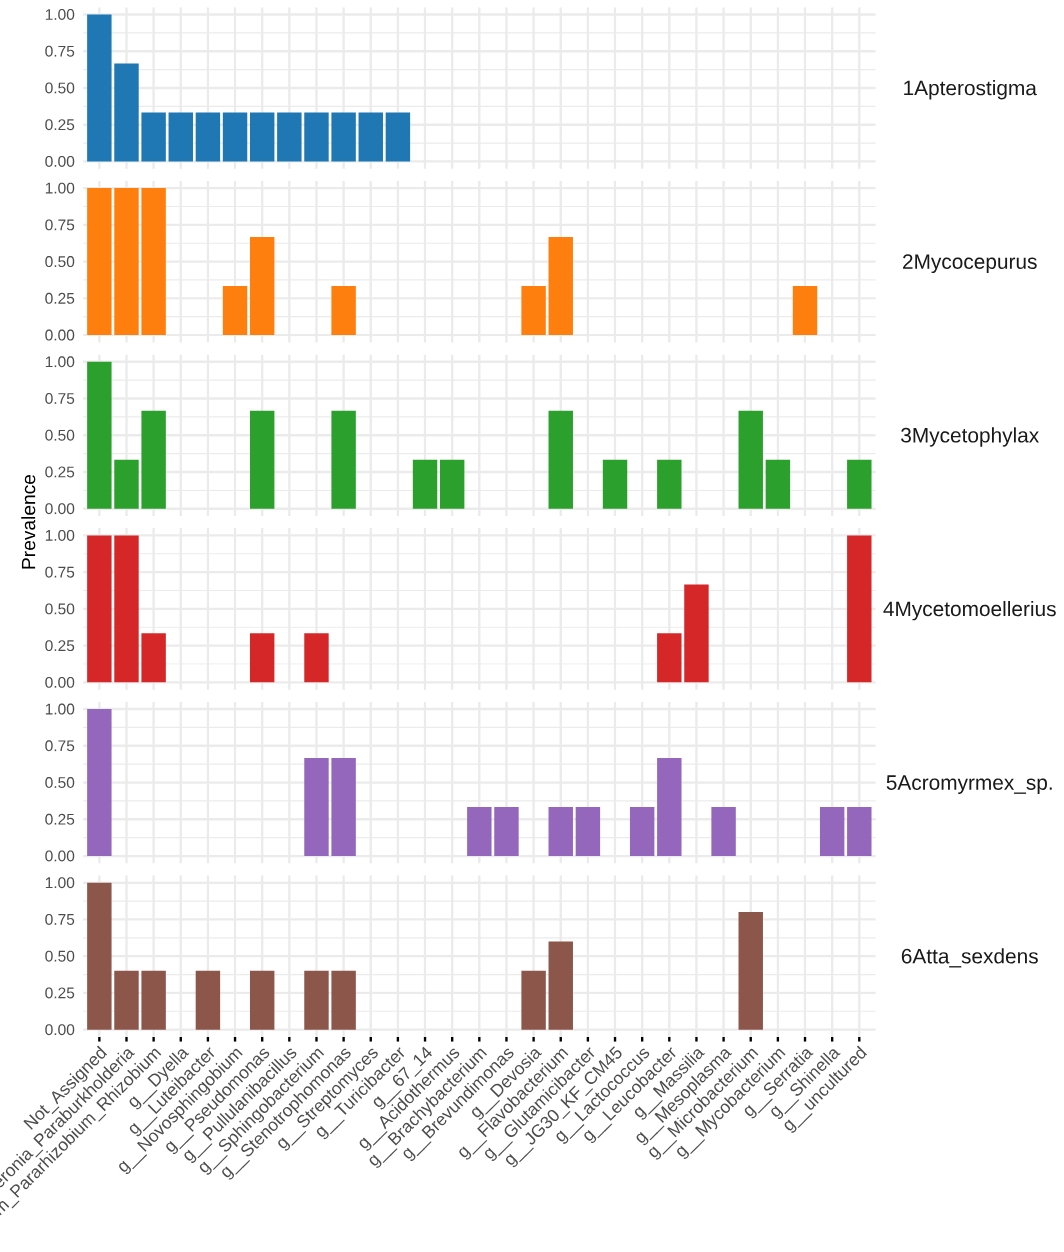


**Fig. S8** – Biomarker genera determination based on linear discriminant analysis effect size. LEfSe detect features significantly more abundant in one or more ant gardens, with the heatmap indicating which taxa are differentially abundant in which fungiculture system.


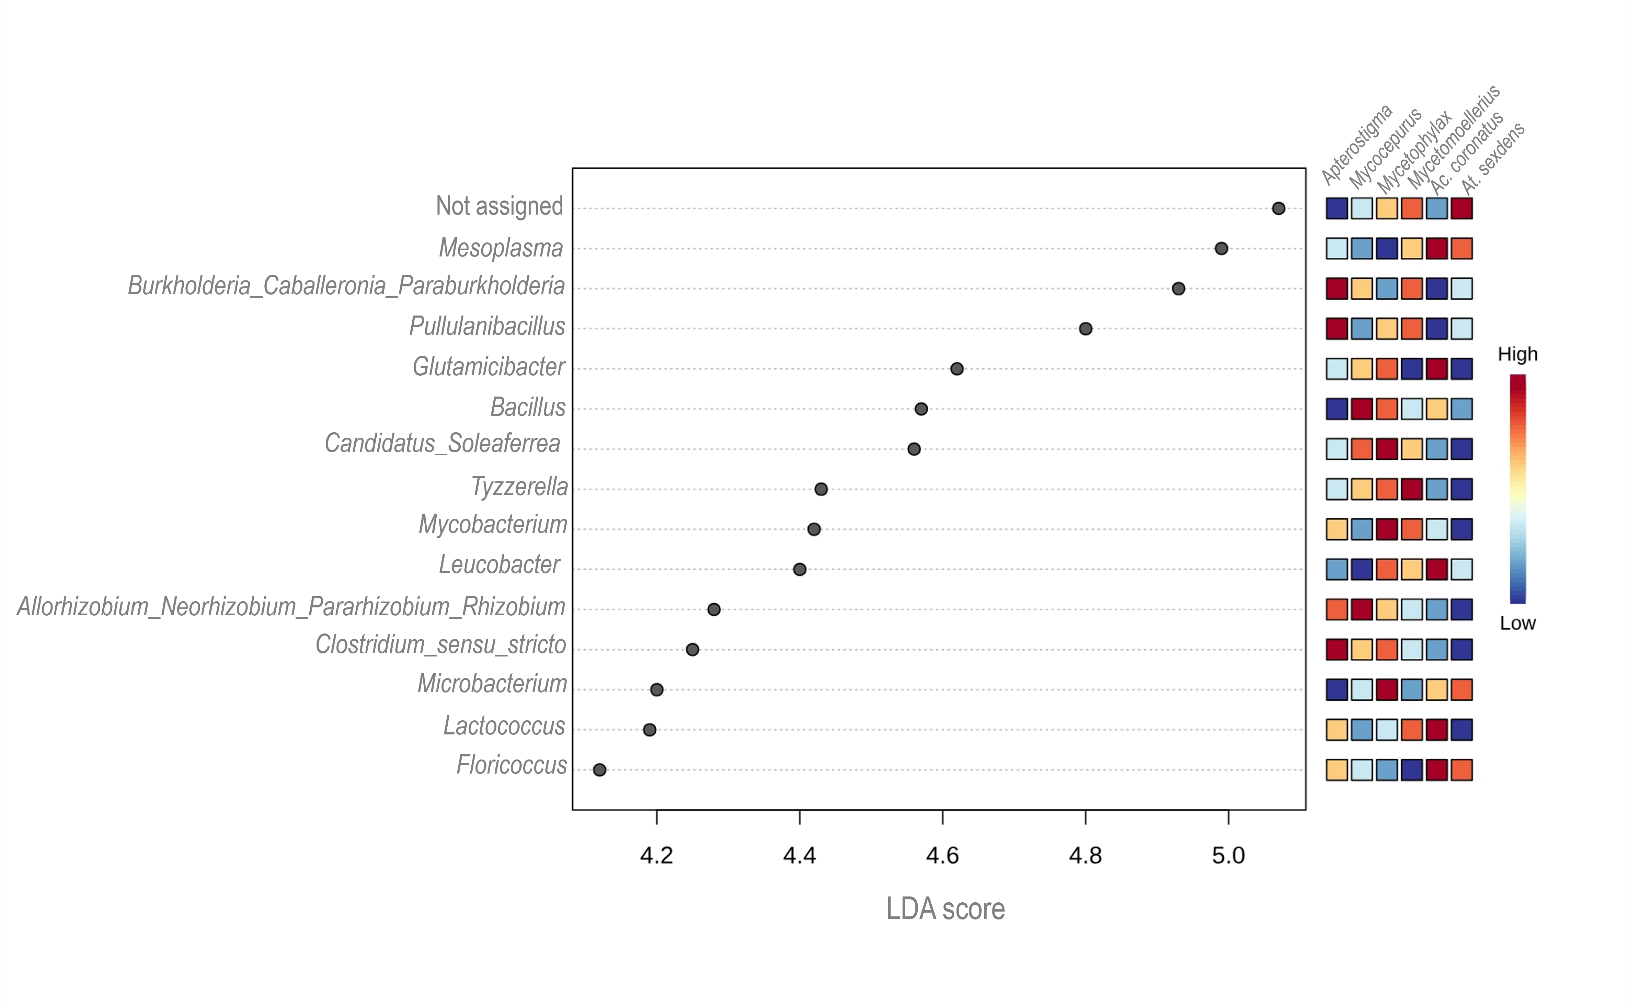


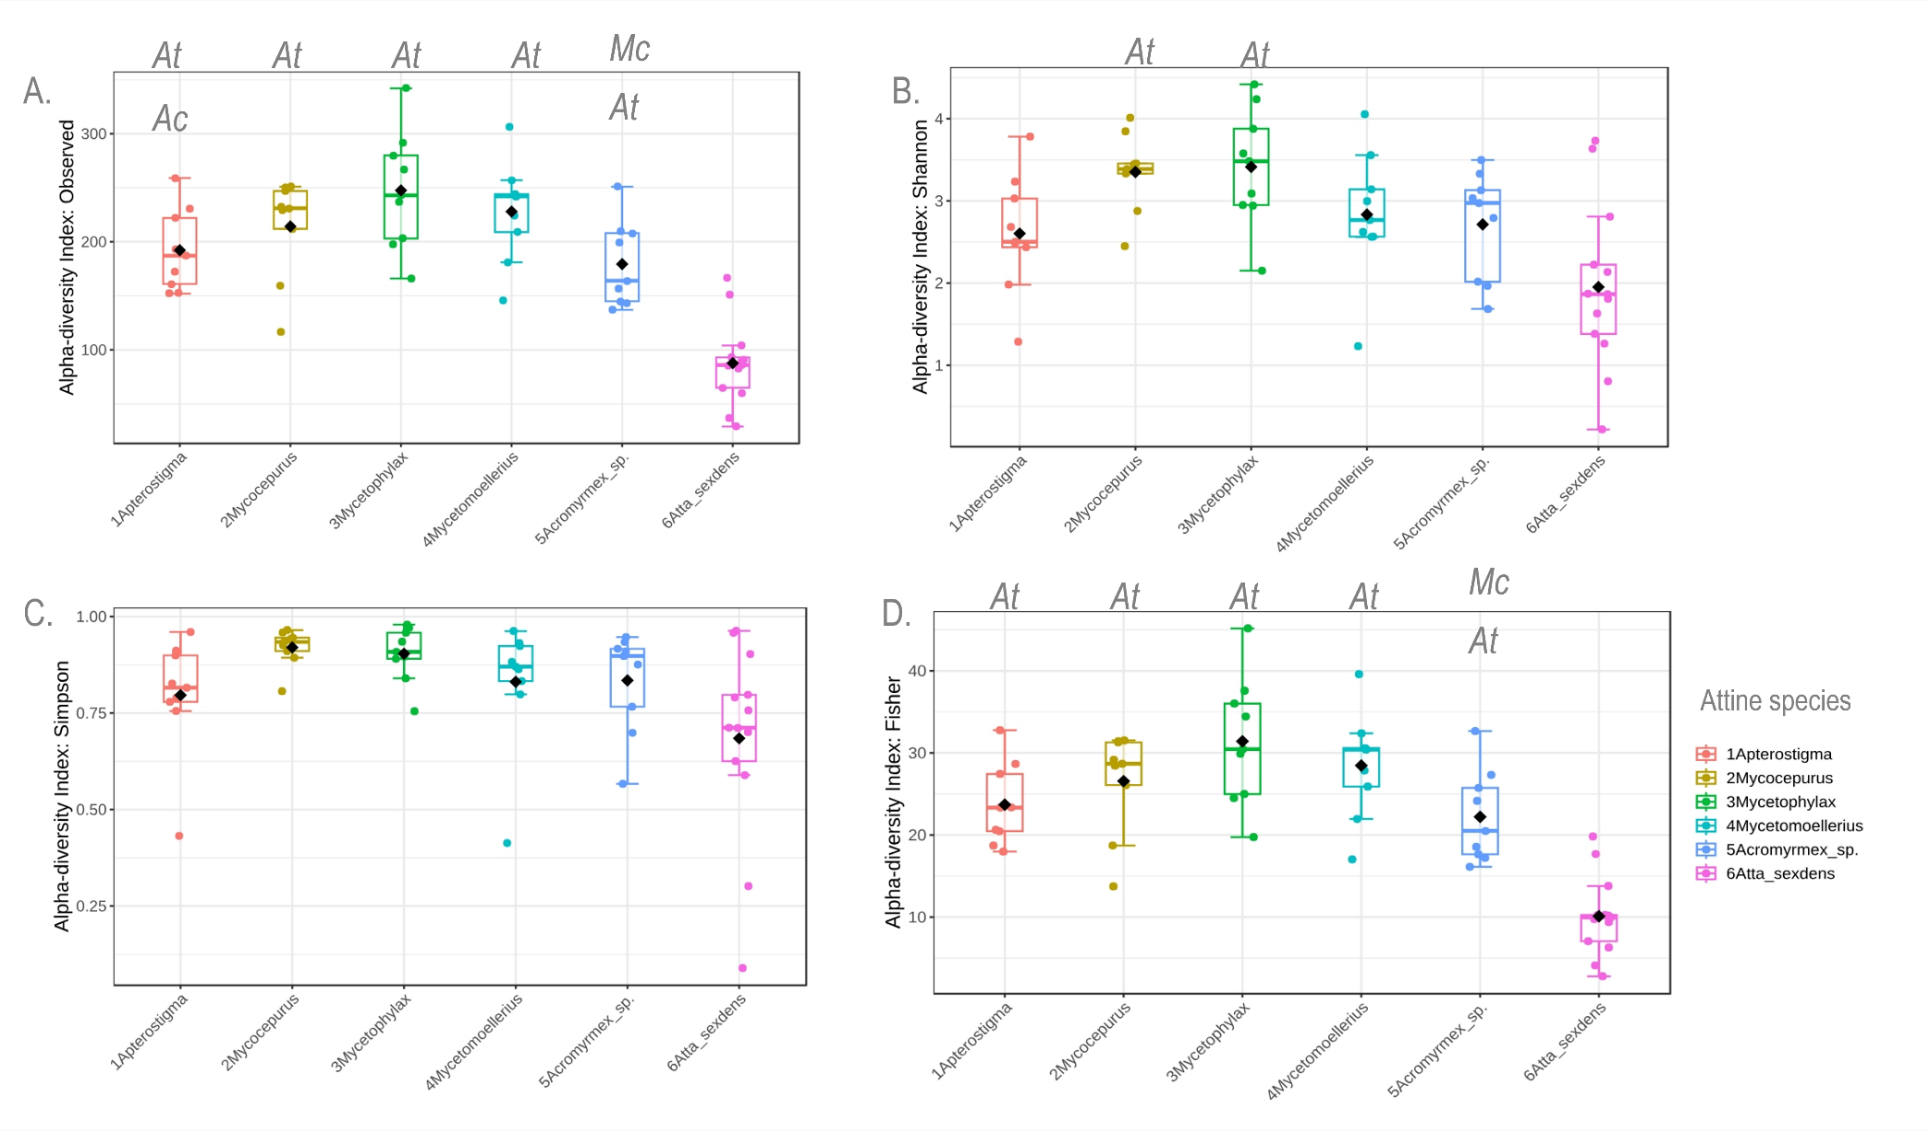
**Fig. S9** – Bacterial diversity of different garden regions. Alpha-diversity indices were estimated at genus level, based on Observed Features (Richness), Shannon, Simpson, and Fisher. Significant differences were estimated by Mann-Whitney/Kruskal-Wallis, with the Wilcoxon test for post hoc pairwise comparisons. Significant differences between attine species (Wilcoxon test, FDR-adjusted p < 0.05) are indicated by letters (*At: Atta sexdens; Ac: Acromyrmex; Mc: Mycetophylax.*)


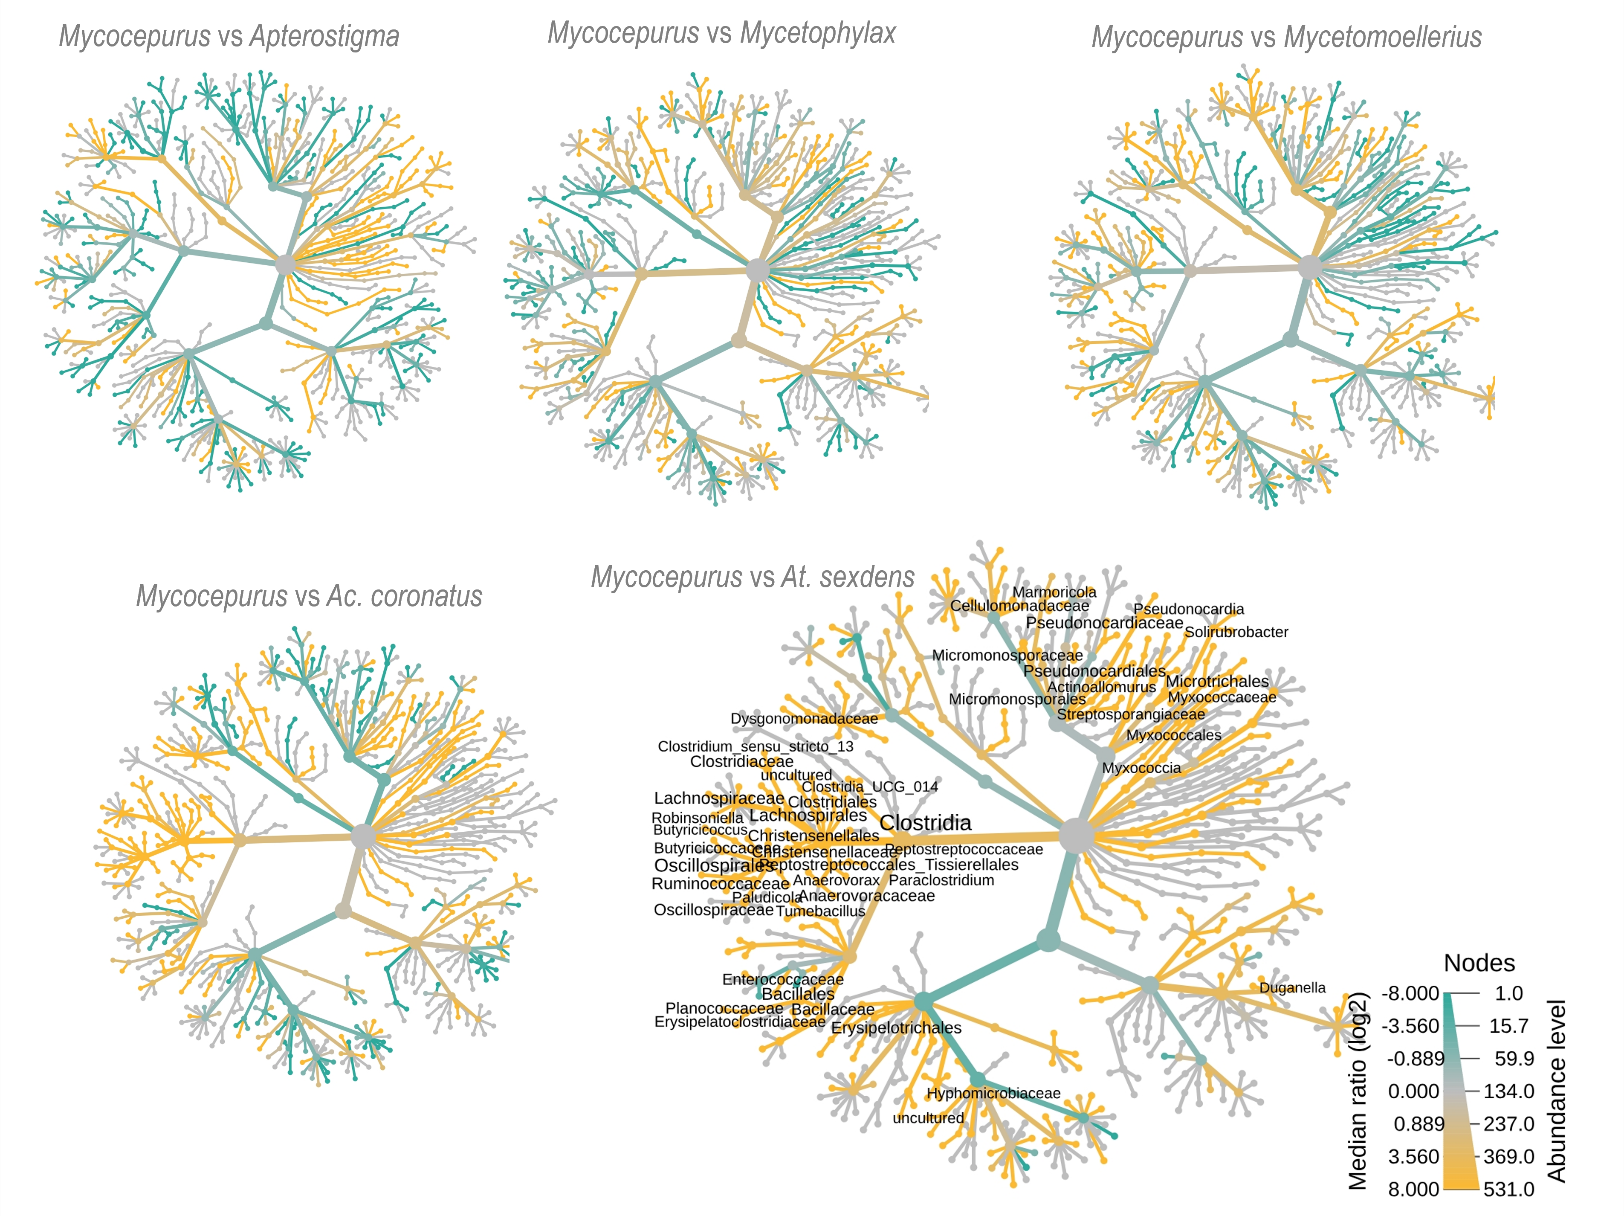
**Fig. S10** - Bacterial genus-level heat tree, comparing group-wise relative abundances (Wilcoxon test, *P <*0.05) between *Mycocepurus* sp. and other attine in young gardens. Bacterial genera are denoted (i.e., whose names are written) in the heat-tree only when significantly differ between attine being compared.


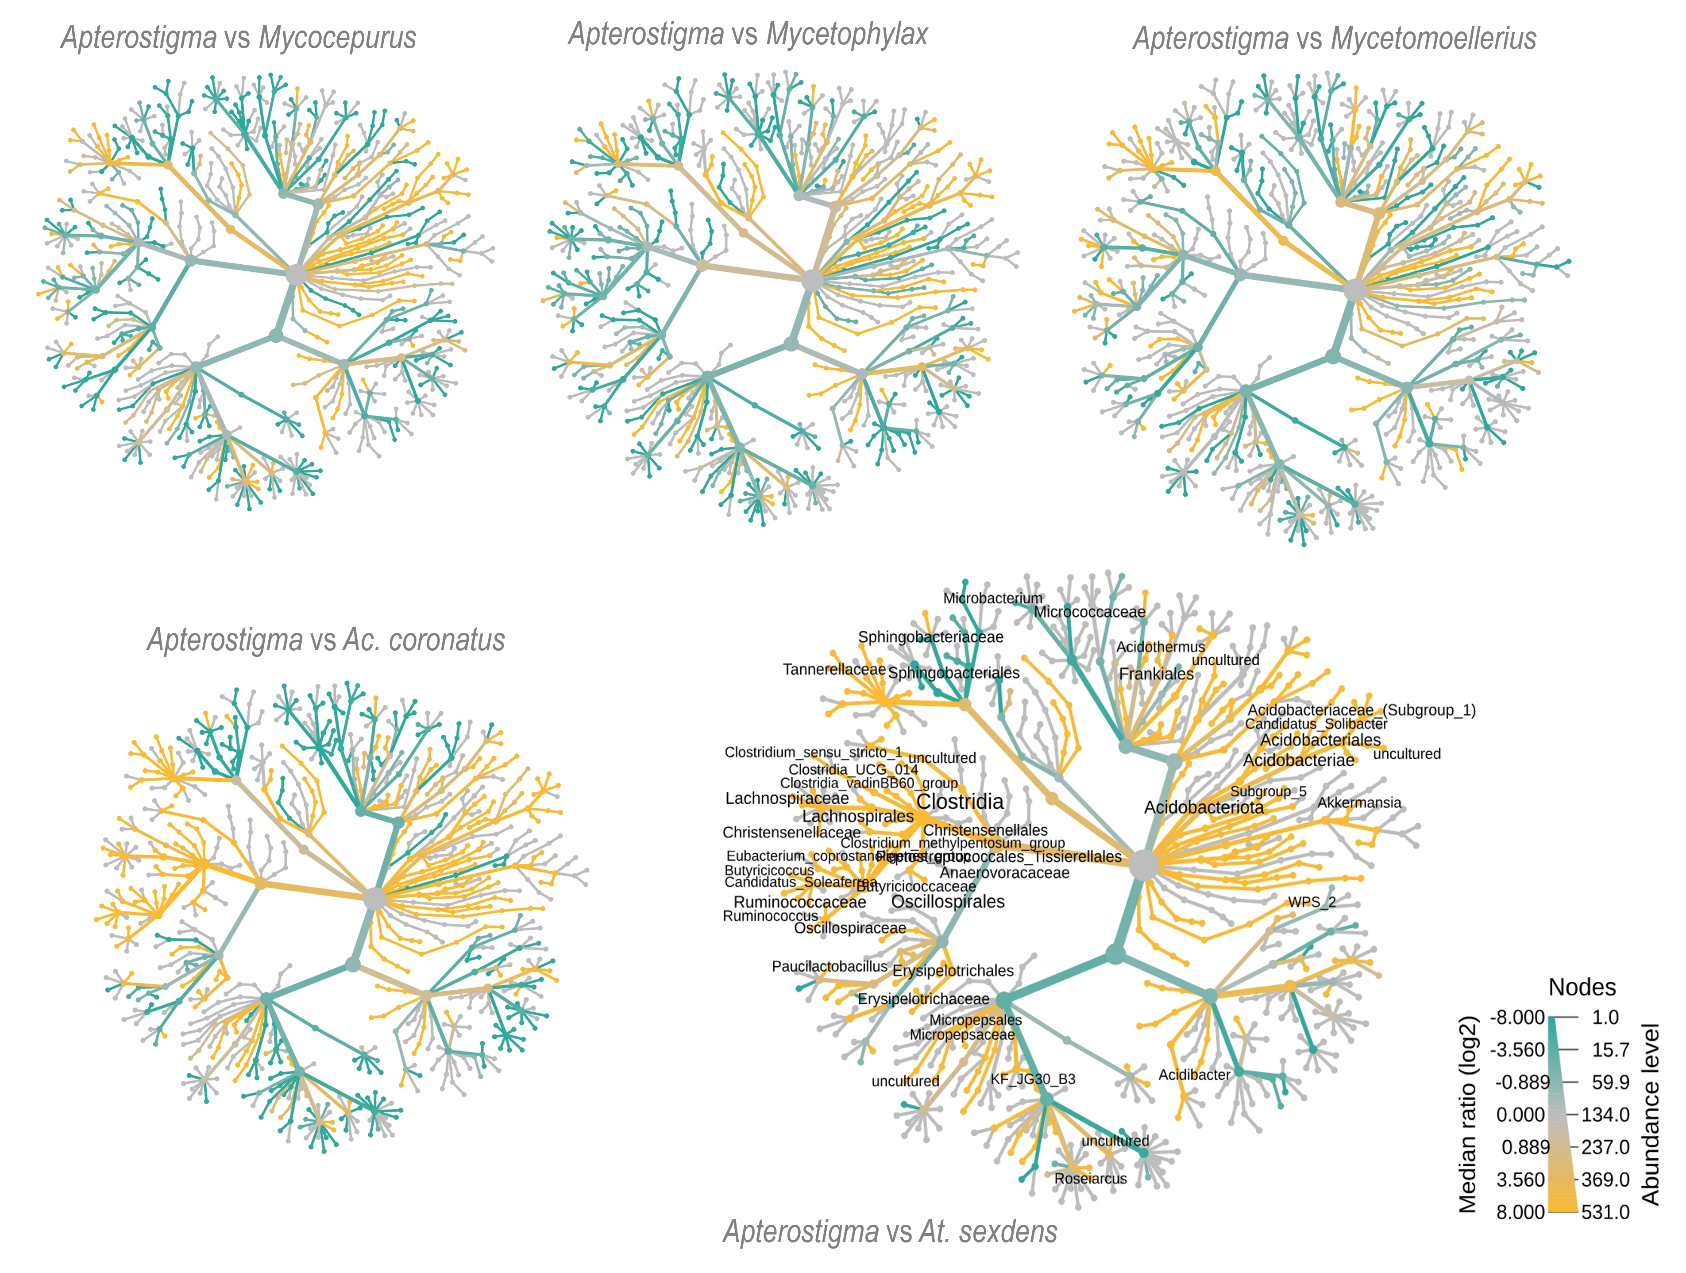
**Fig. S11** - Bacterial genus-level heat tree, comparing group-wise relative abundances (Wilcoxon test, *P <*0.05) between *Apterostigma* sp. and other attine in young gardens. Bacterial genera are denoted (i.e., whose names are written) in the heat-tree only when significantly differ between attine being compared.


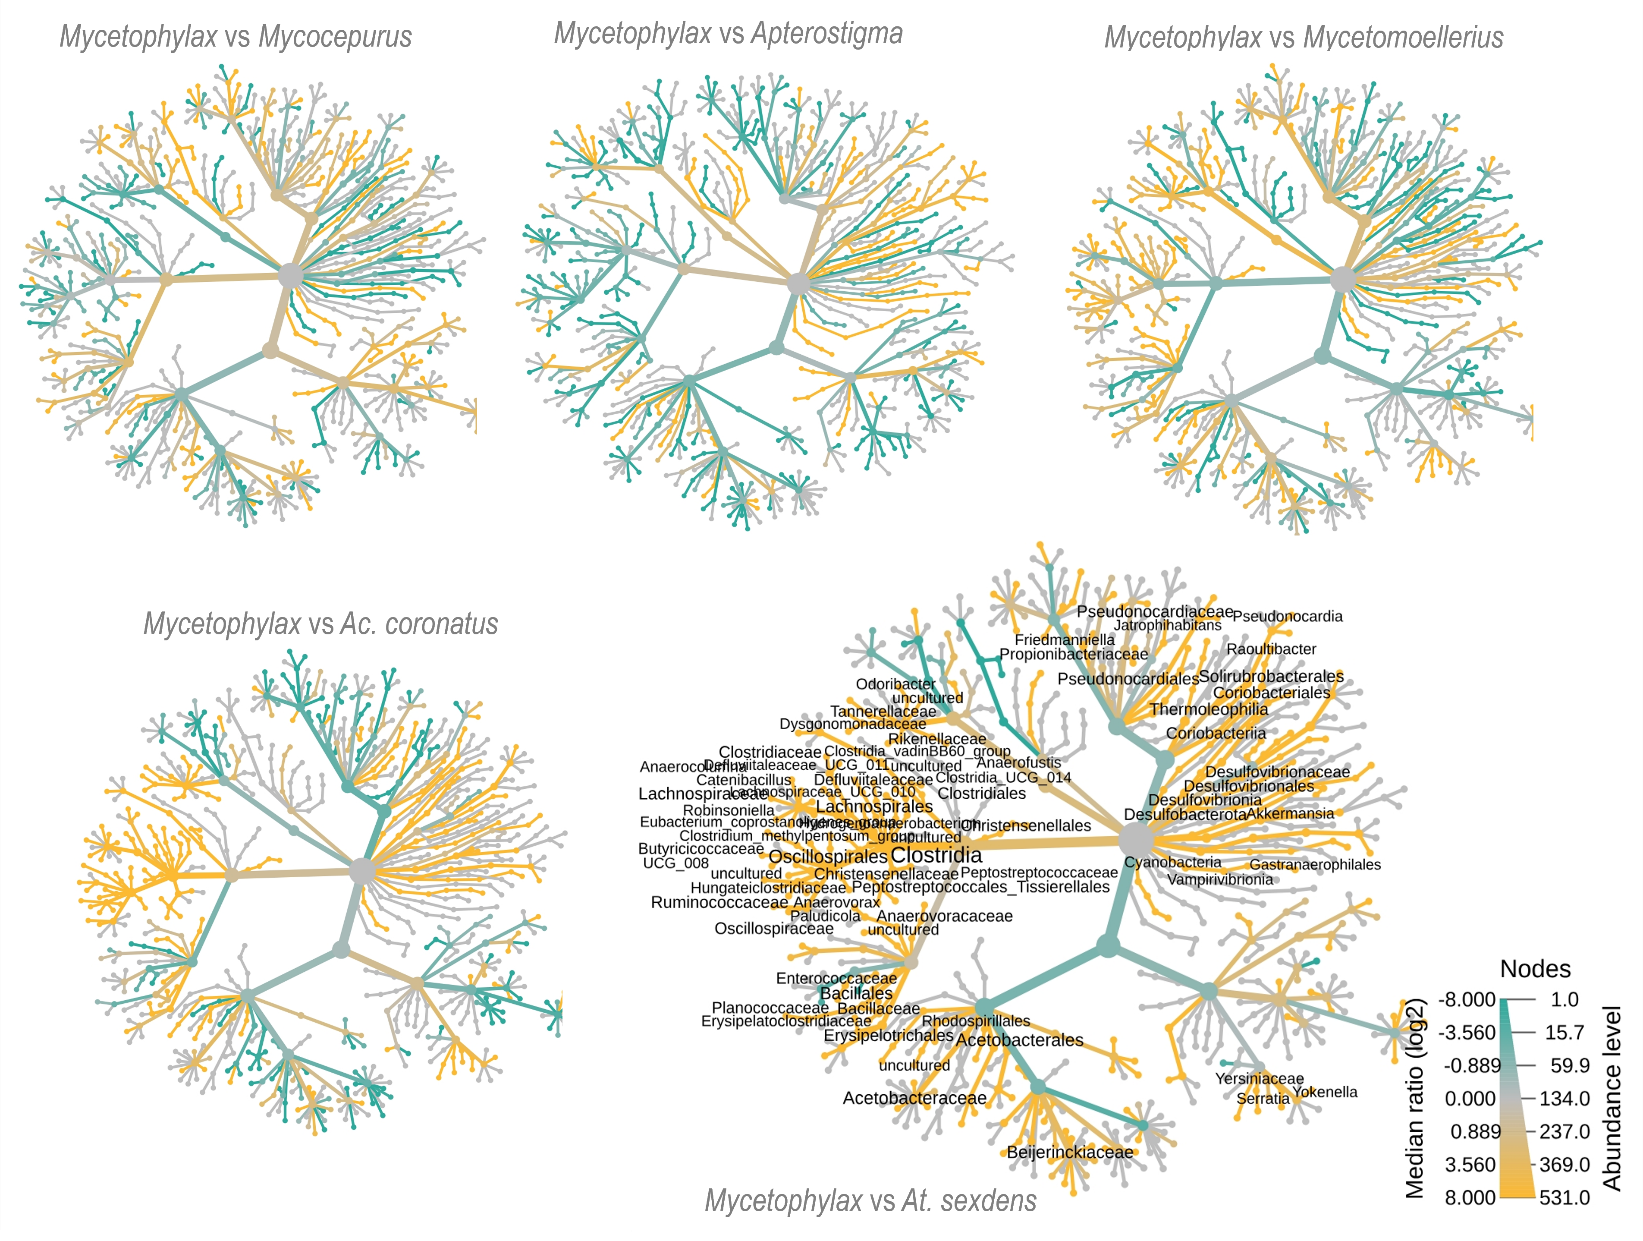
**Fig. S12** - Bacterial genus-level heat tree, comparing group-wise relative abundances (Wilcoxon test, *P <*0.05) between *Mycetophylax* sp. and other attine in young gardens. Bacterial genera are denoted (i.e., whose names are written) in the heat-tree only when significantly differ between attine being compared.


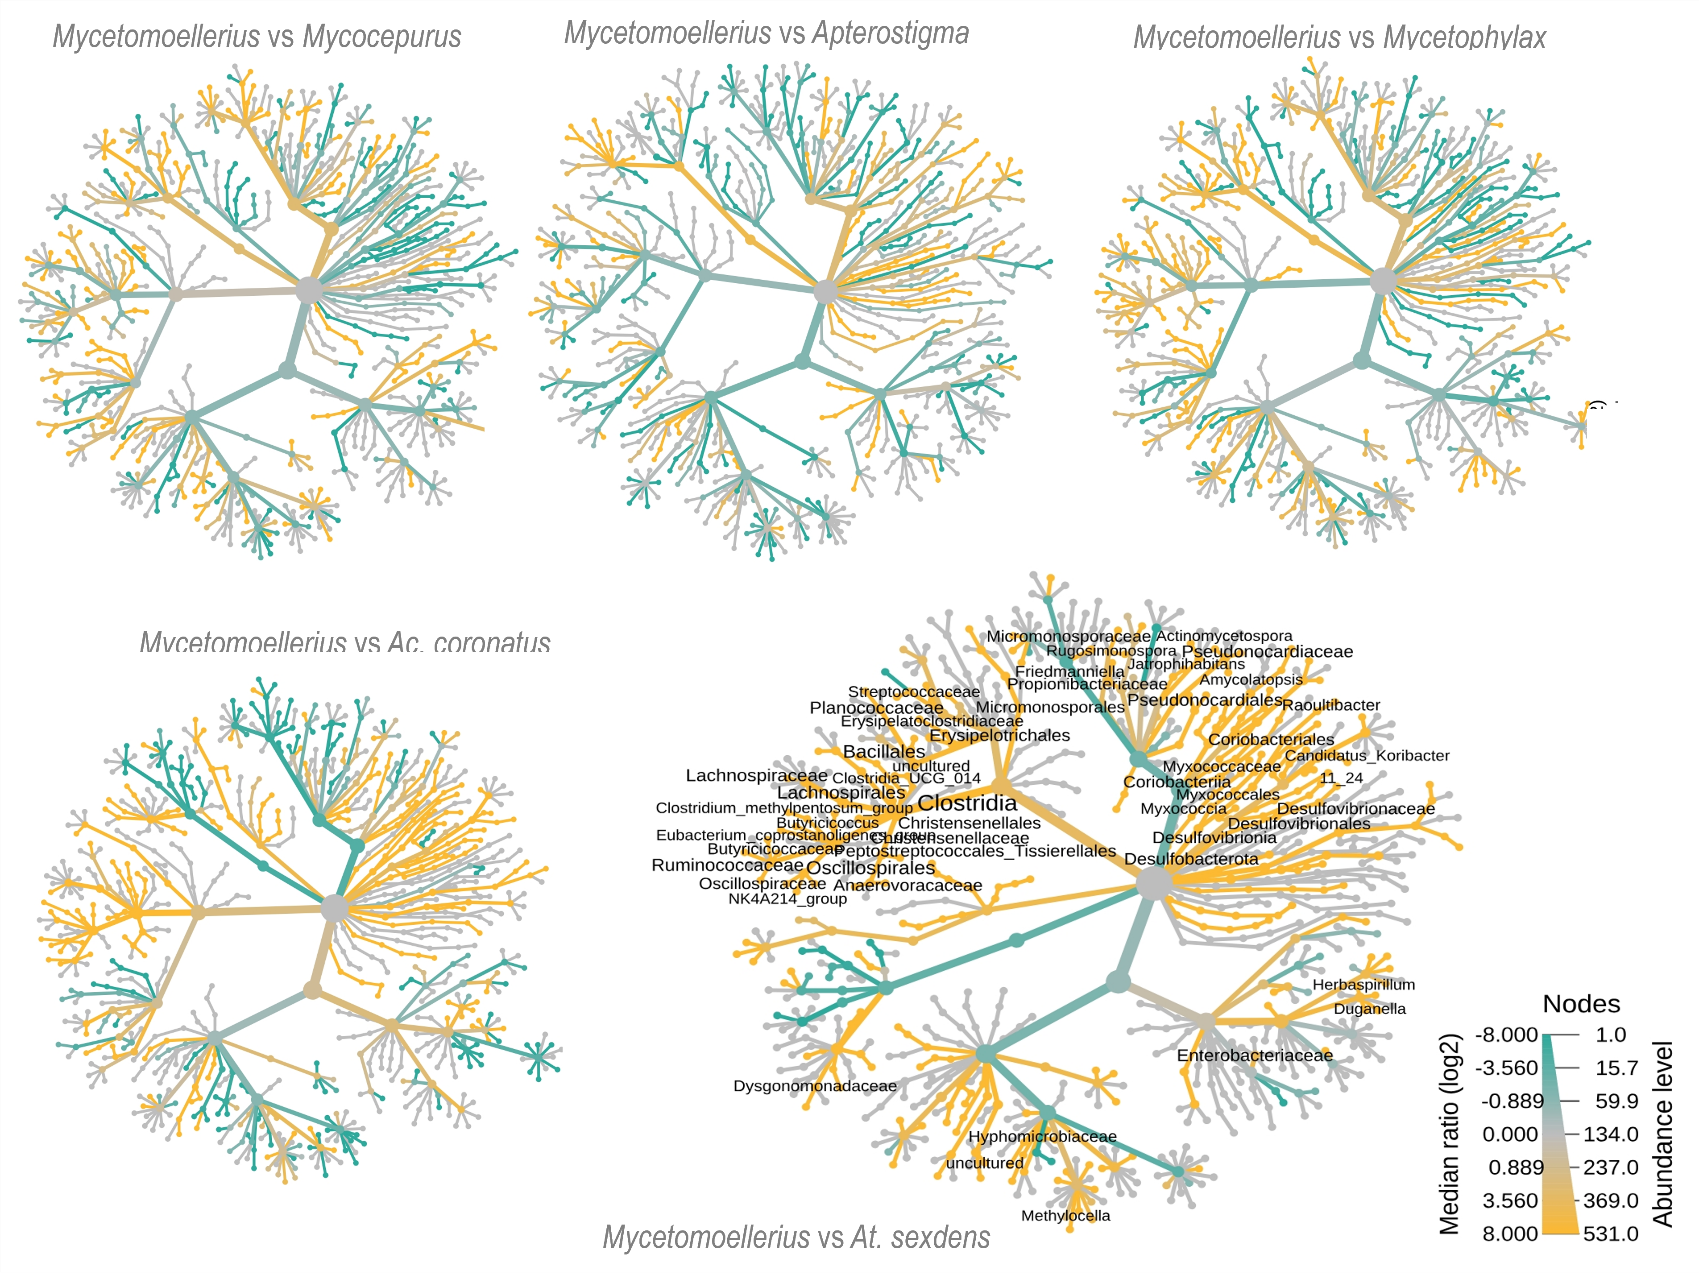
**Fig. S13** - Bacterial genus-level heat tree, comparing group-wise relative abundances (Wilcoxon test, *P <*0.05) between *Mycetomoellerius* sp. and other attine in young gardens. Bacterial genera are denoted (i.e., whose names are written) in the heat-tree only when significantly differ between attine being compared.


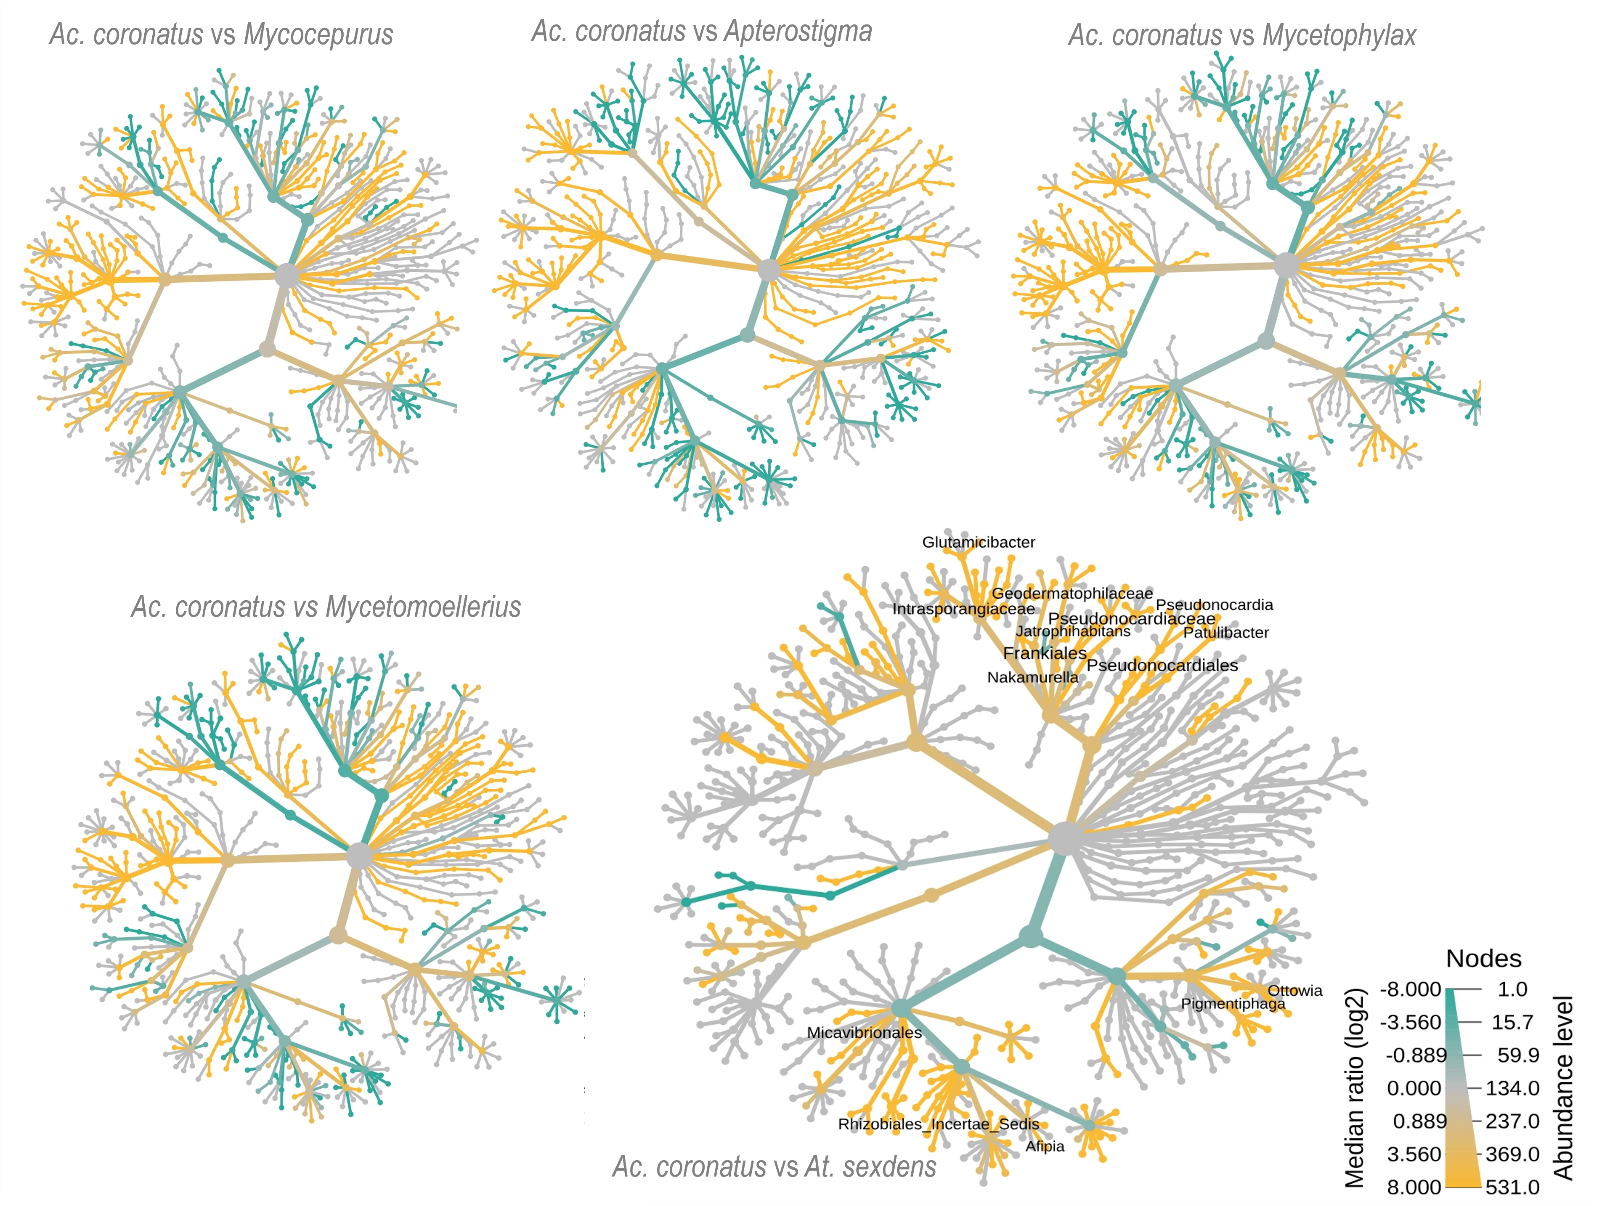
**Fig. S14** - Bacterial genus-level heat tree, comparing group-wise relative abundances (Wilcoxon test, *P <*0.05) between *Acromyrmex coronatus* and other attine in young gardens. Bacterial genera are denoted (i.e., whose names are written) in the heat-tree only when significantly differ between attine being compared.


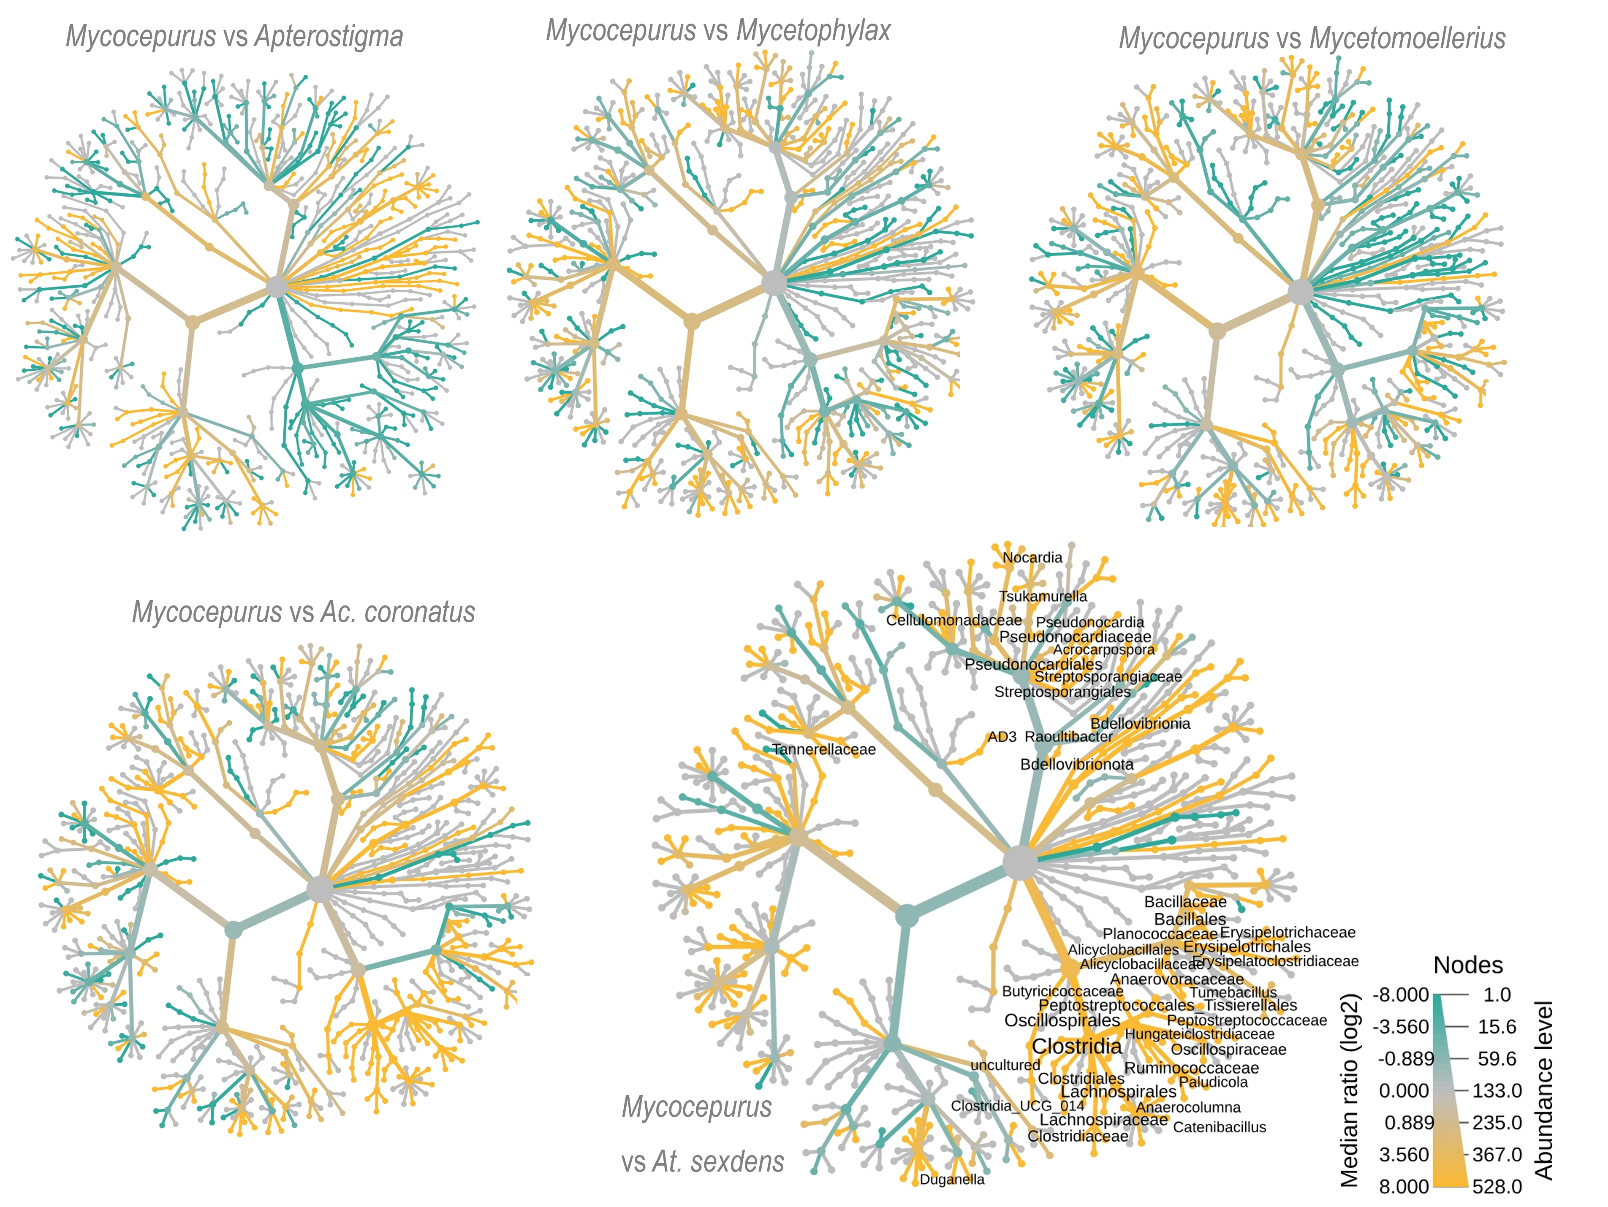
**Fig. S15** - Bacterial genus-level heat tree, comparing group-wise relative abundances (Wilcoxon test, *P <*0.05) between *Mycocepurus* sp. and other attine in old gardens. Bacterial genera are denoted (i.e., whose names are written) in the heat-tree only when significantly differ between attine being compared.


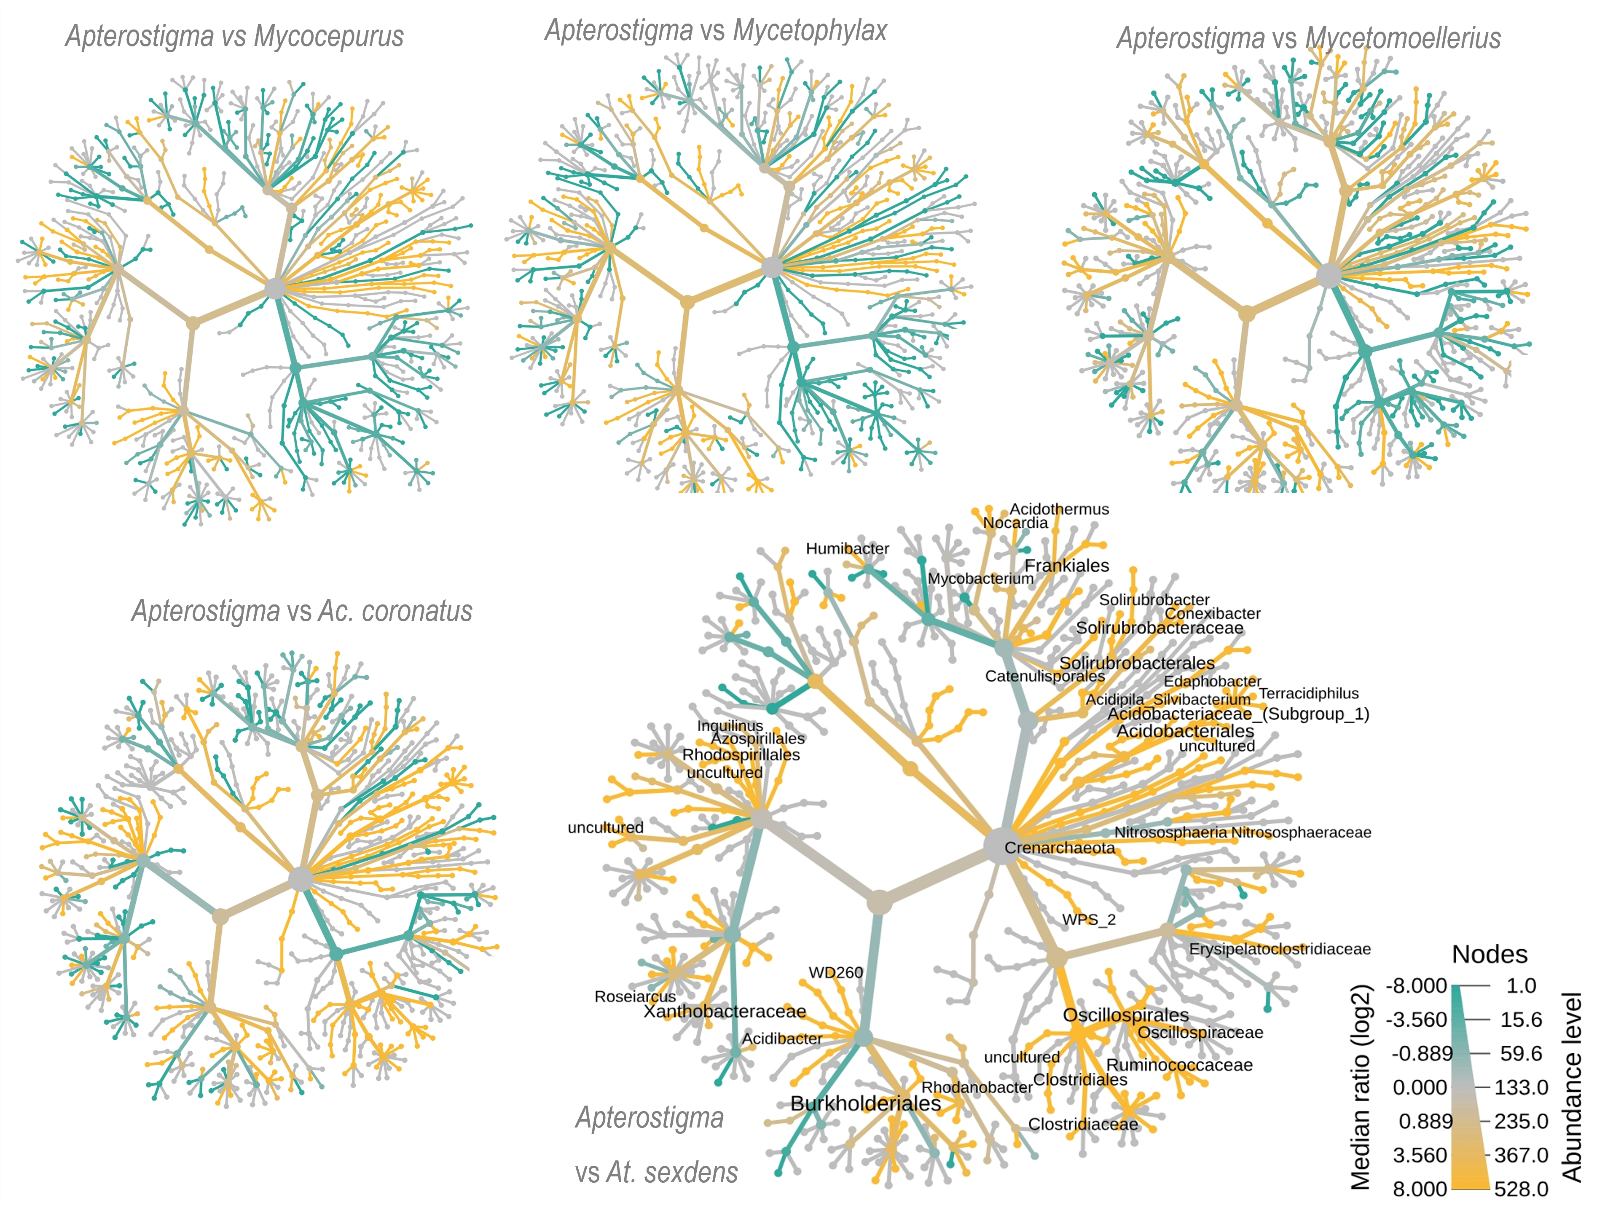
**Fig. S16** - Bacterial genus-level heat tree, comparing group-wise relative abundances (Wilcoxon test, *P <*0.05) between *Apterostigma* sp. and other attine in old gardens. Bacterial genera are denoted (i.e., whose names are written) in the heat-tree only when significantly differ between attine being compared.


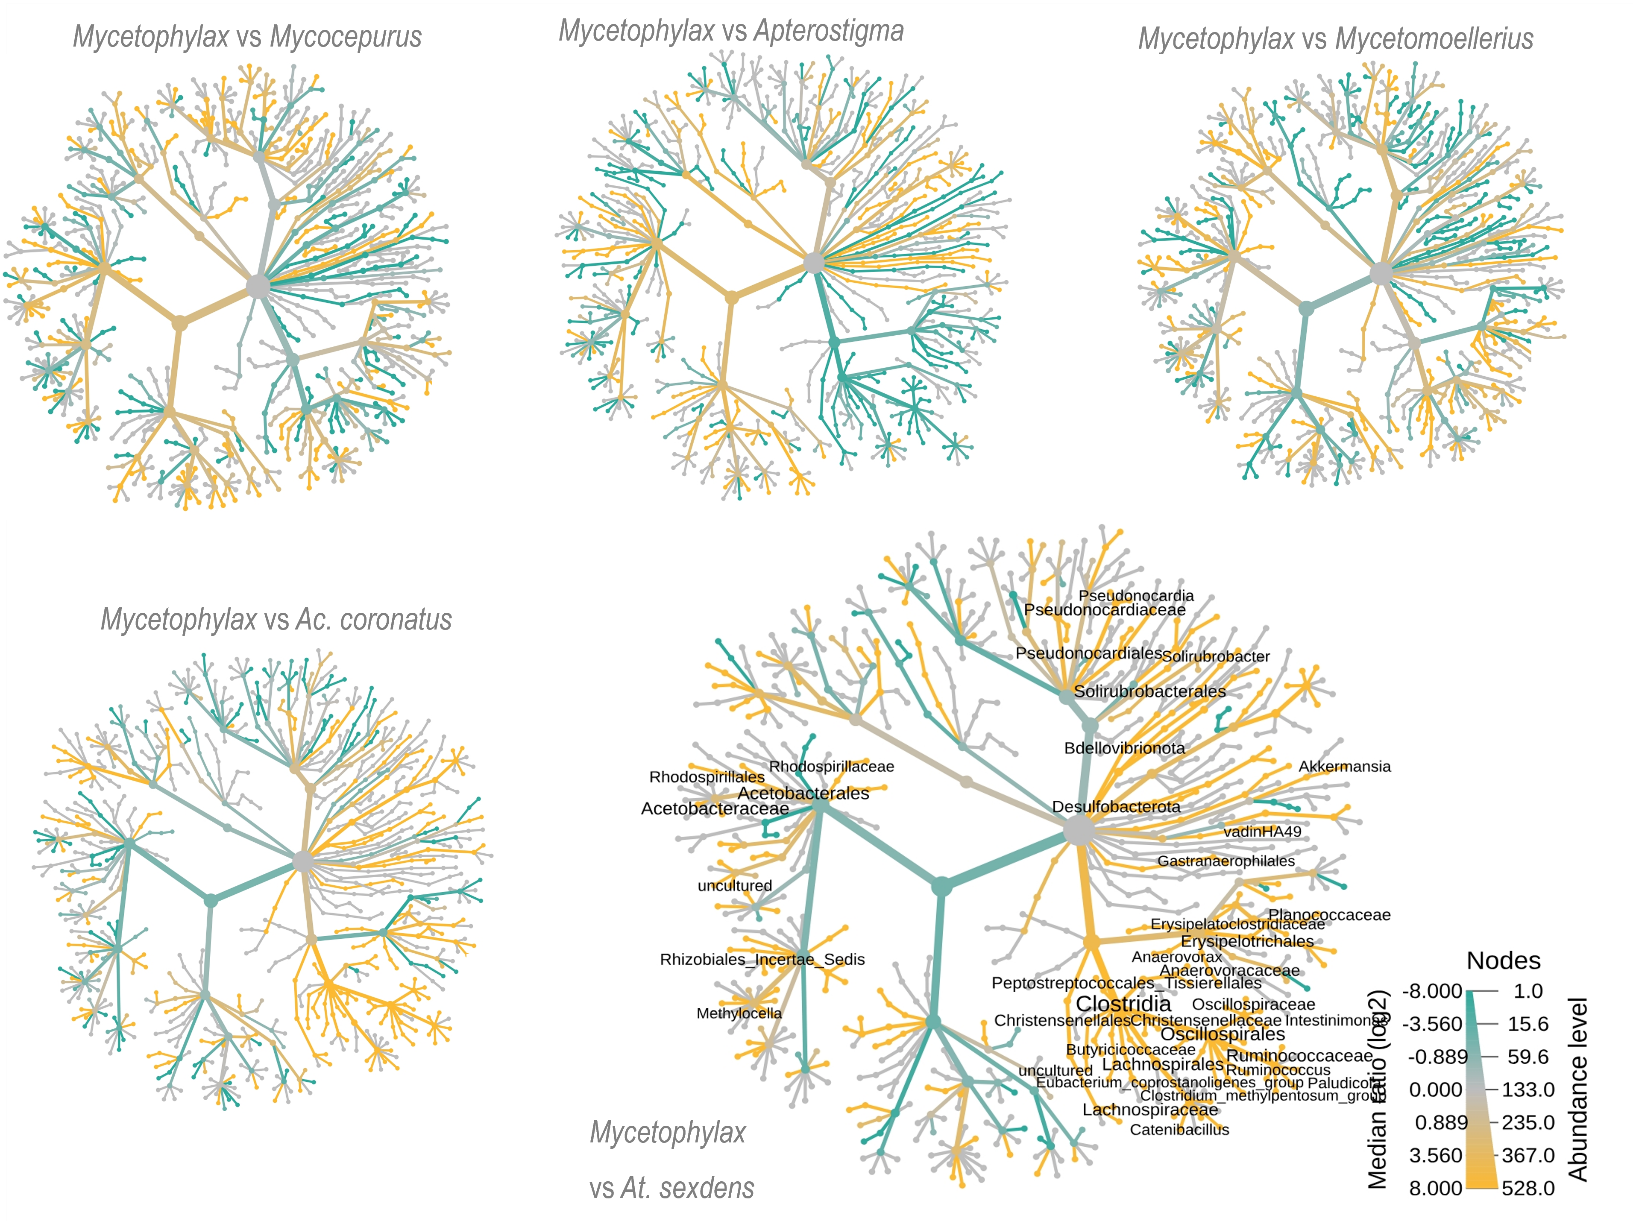
**Fig. S17** - Bacterial genus-level heat tree, comparing group-wise relative abundances (Wilcoxon test, *P <*0.05) between *Mycetophylax* sp. and other attine in old gardens. Bacterial genera are denoted (i.e., whose names are written) in the heat-tree only when significantly differ between attine being compared.


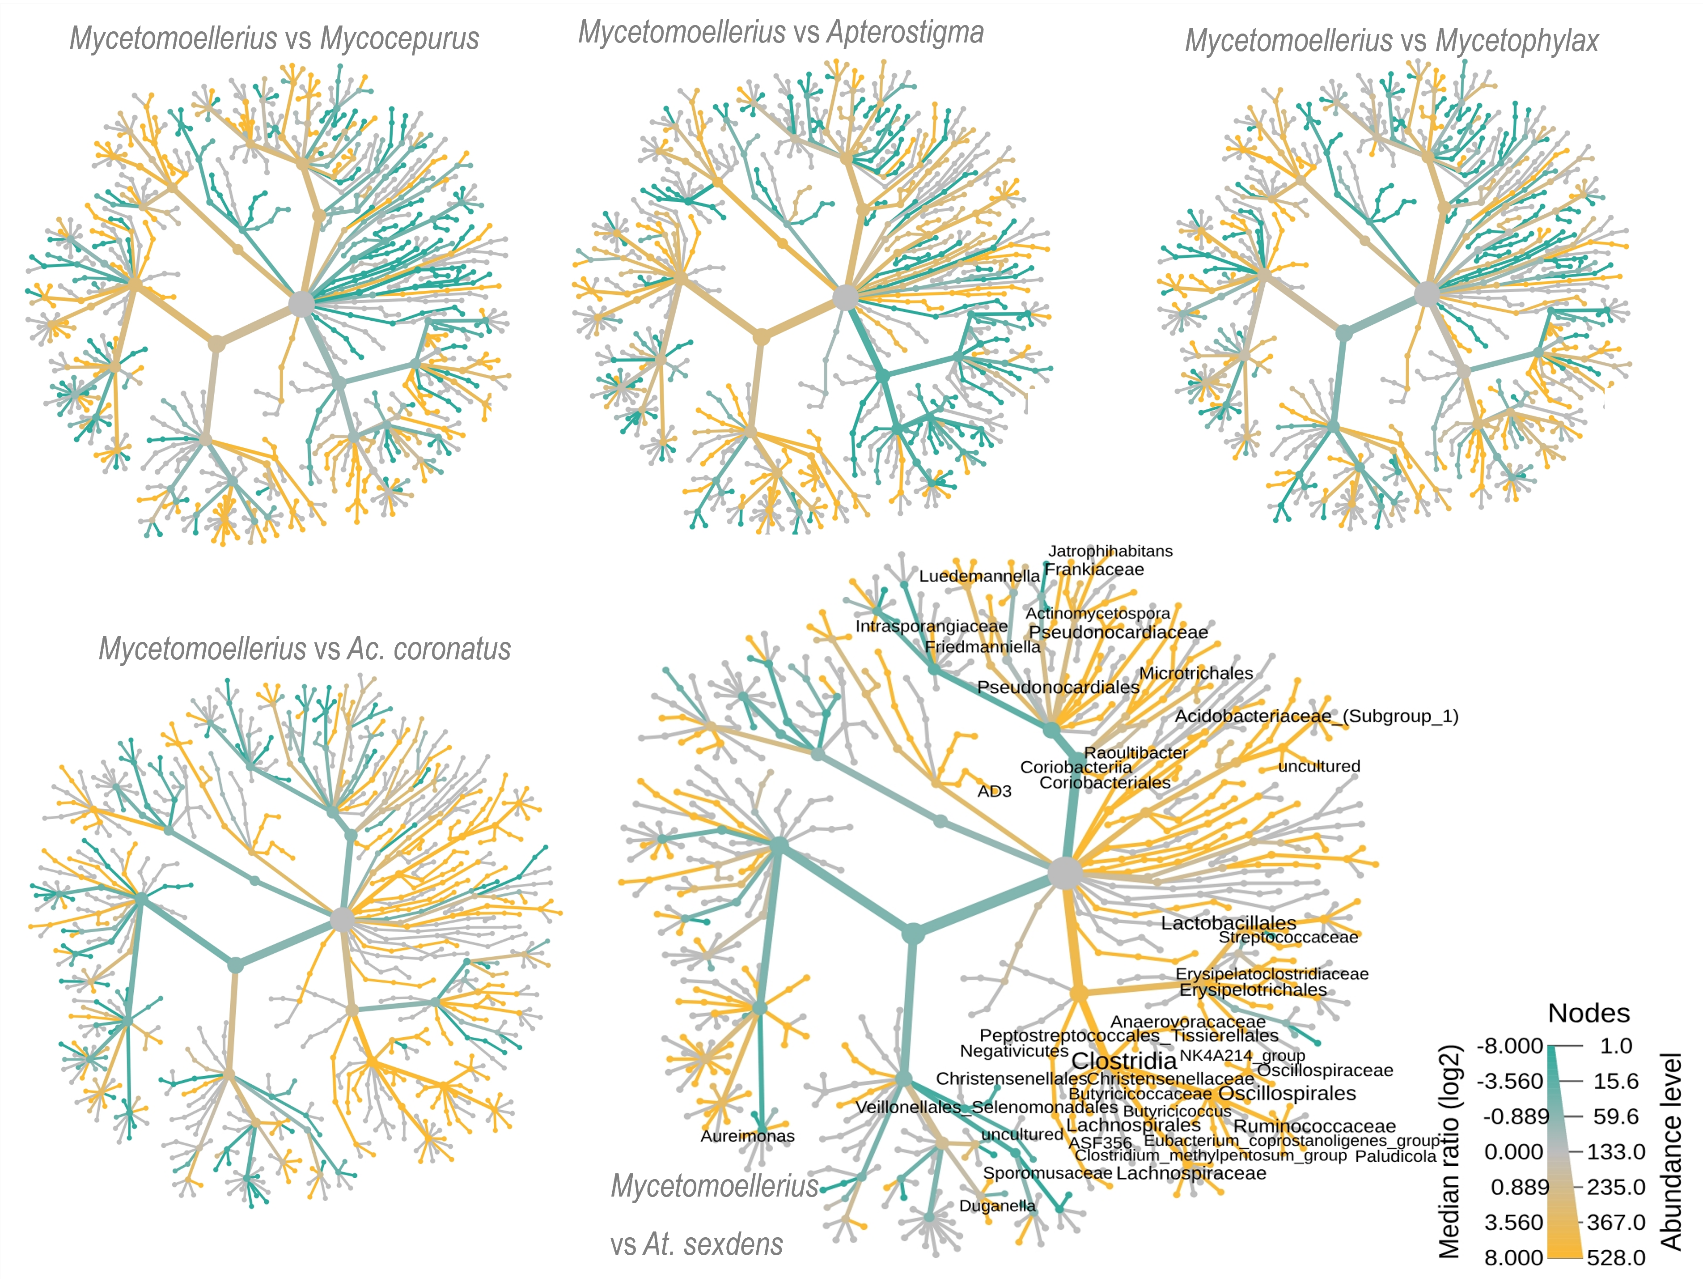
**Fig. S18** - Bacterial genus-level heat tree, comparing group-wise relative abundances (Wilcoxon test, *P <*0.05) between *Mycetomoellerius* sp. and other attine in old gardens. Bacterial genera are denoted (i.e., whose names are written) in the heat-tree only when significantly differ between attine being compared.


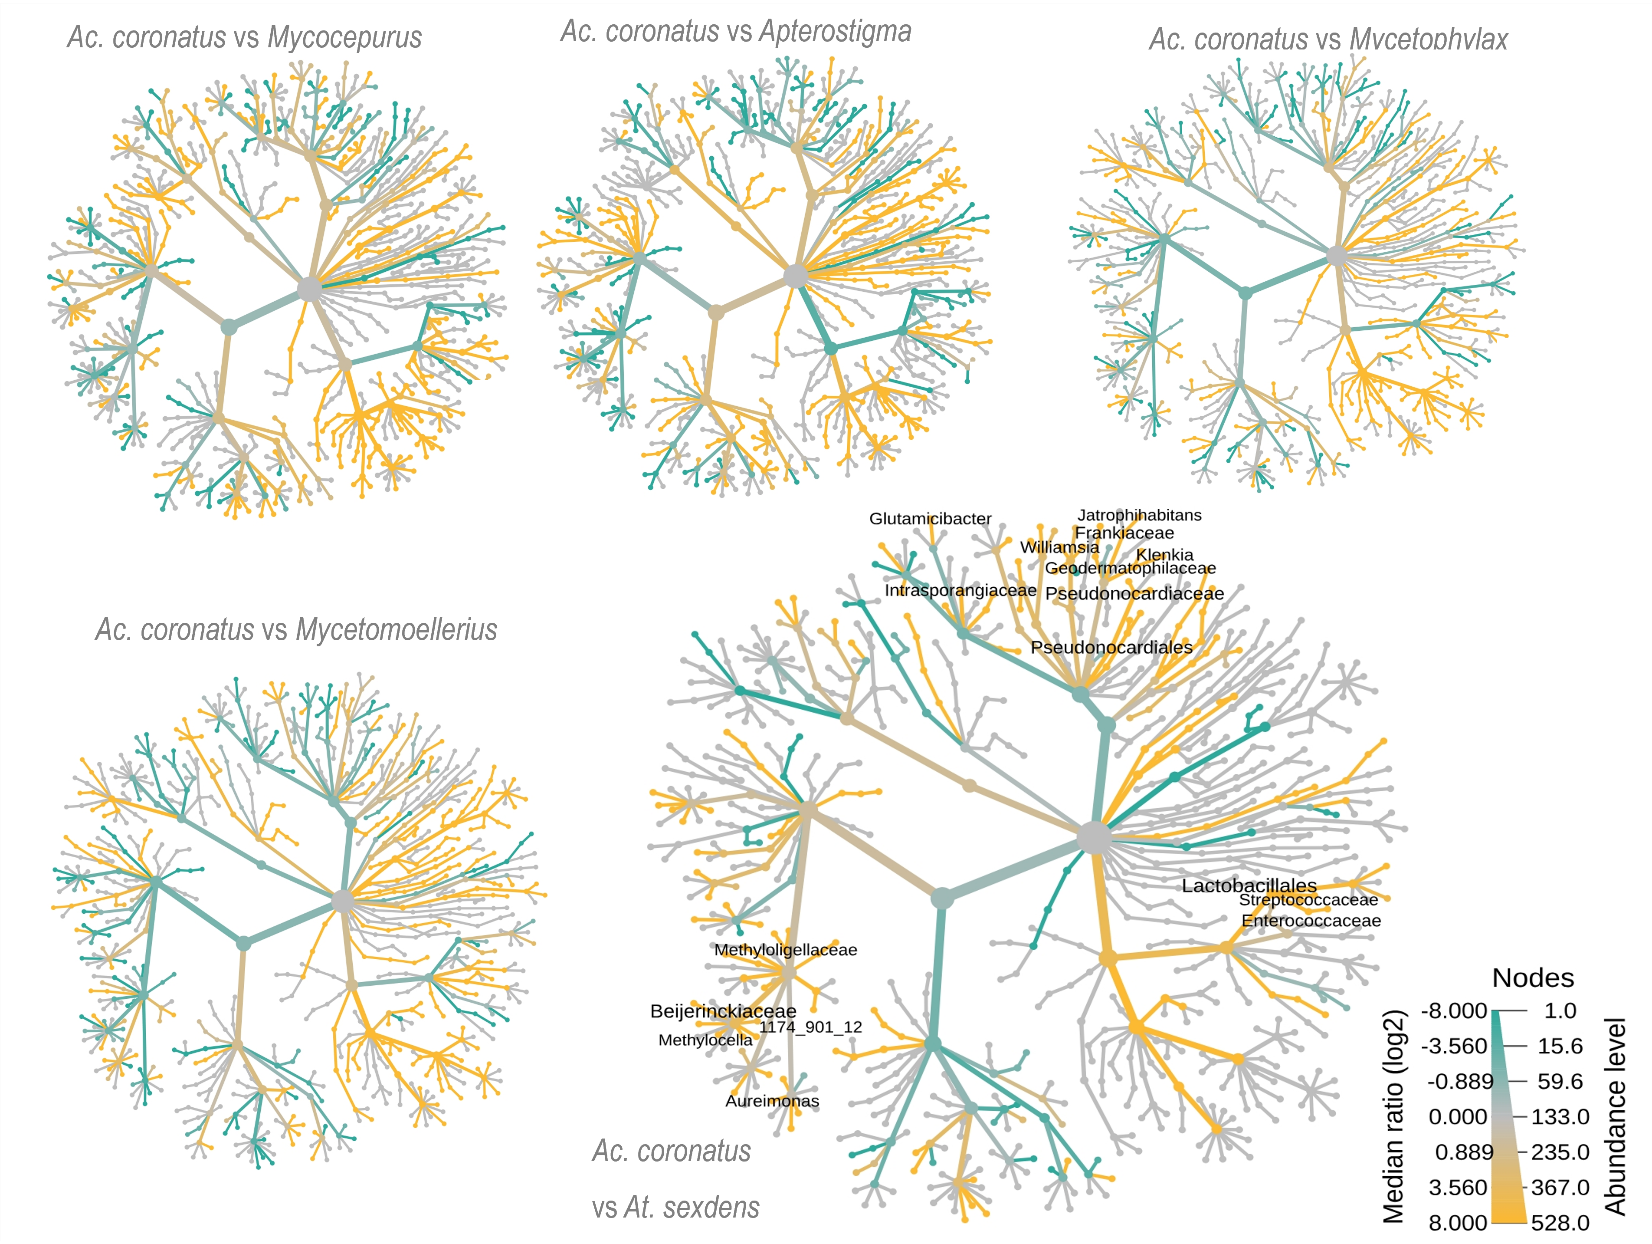
**Fig. S19** - Bacterial genus-level heat tree, comparing group-wise relative abundances (Wilcoxon test, *P <*0.05) between *Acromyrmex coronatus* and other attine in old gardens. Bacterial genera are denoted (i.e., whose names are written) in the heat-tree only when significantly differ between attine being compared.


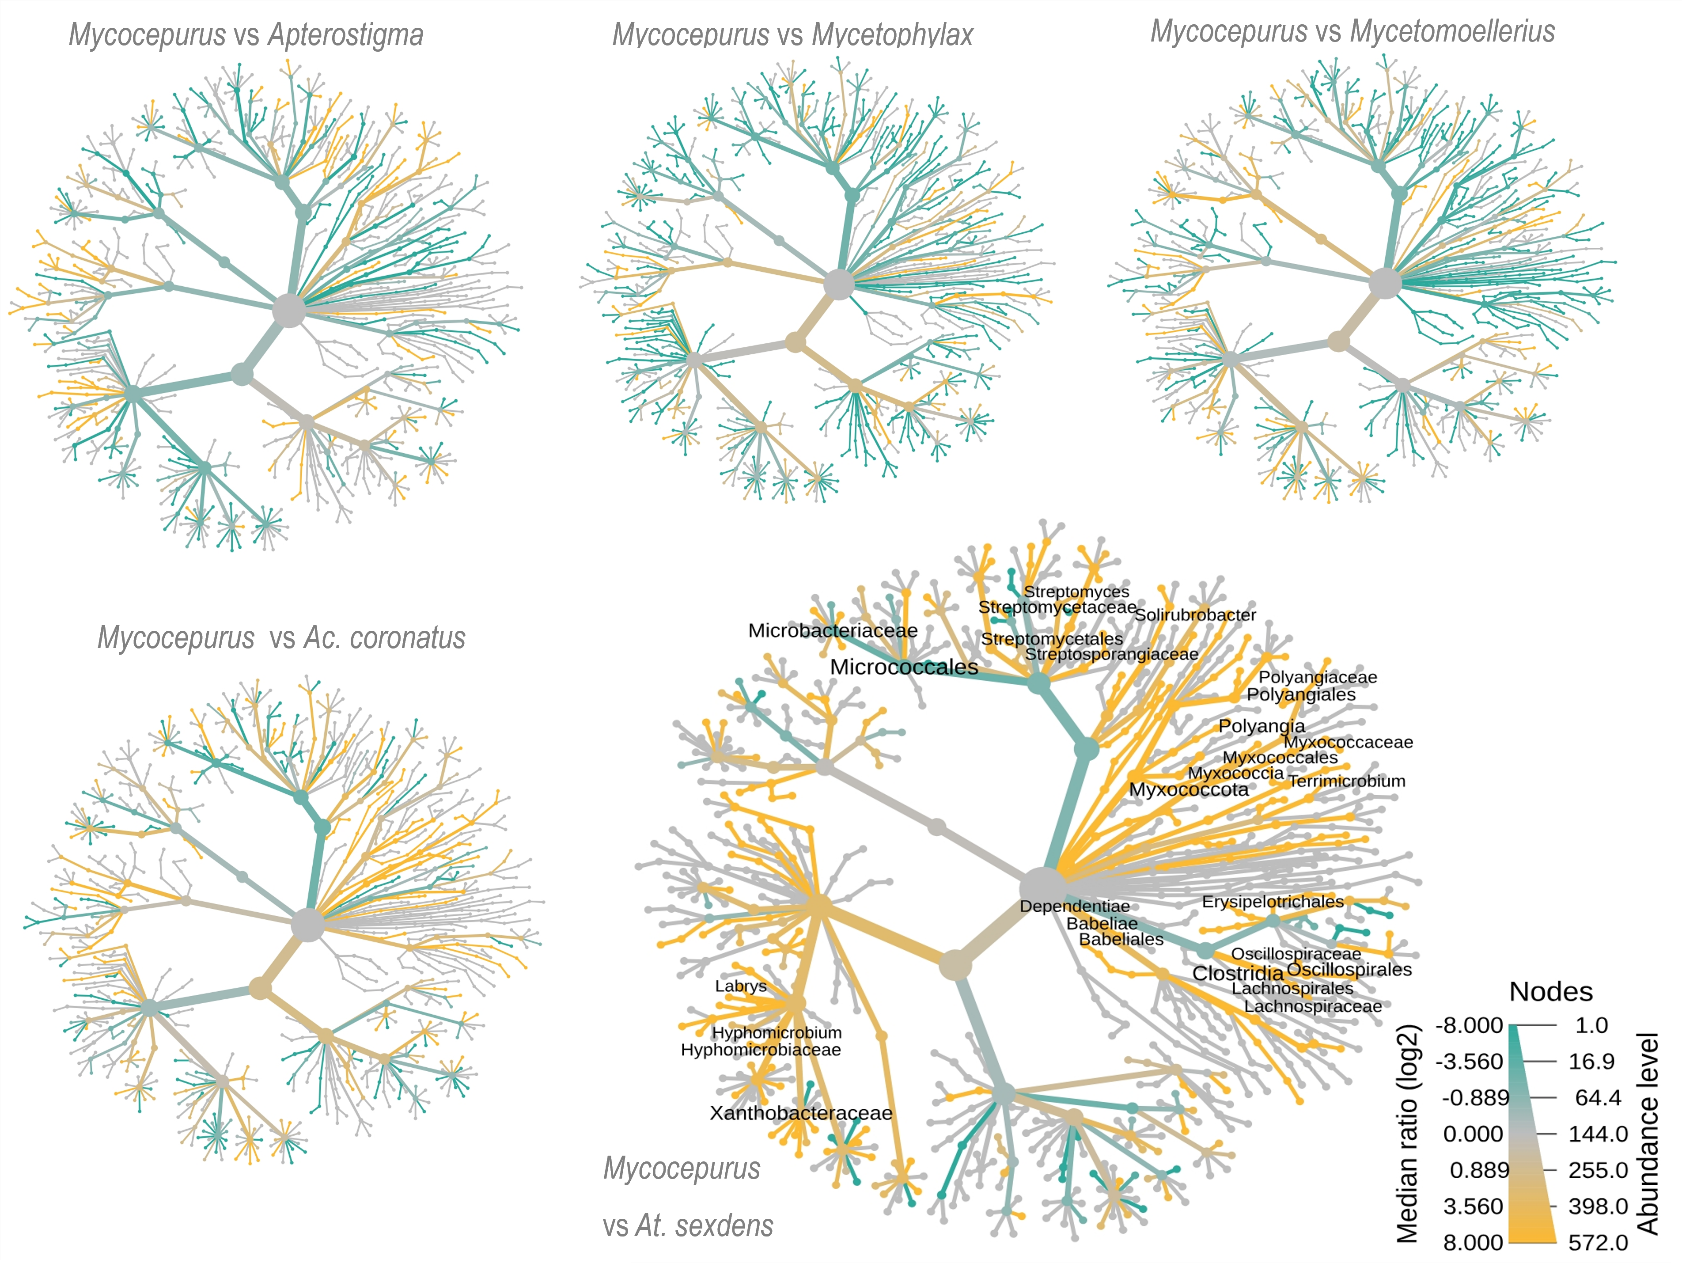
 **Fig. S20** - Bacterial genus-level heat tree, comparing group-wise relative abundances (Wilcoxon test, *P <*0.05) between *Mycocepurus* sp. and other attine in the waste. Bacterial genera are denoted (i.e., whose names are written) in the heat-tree only when significantly differ between attine being compared.


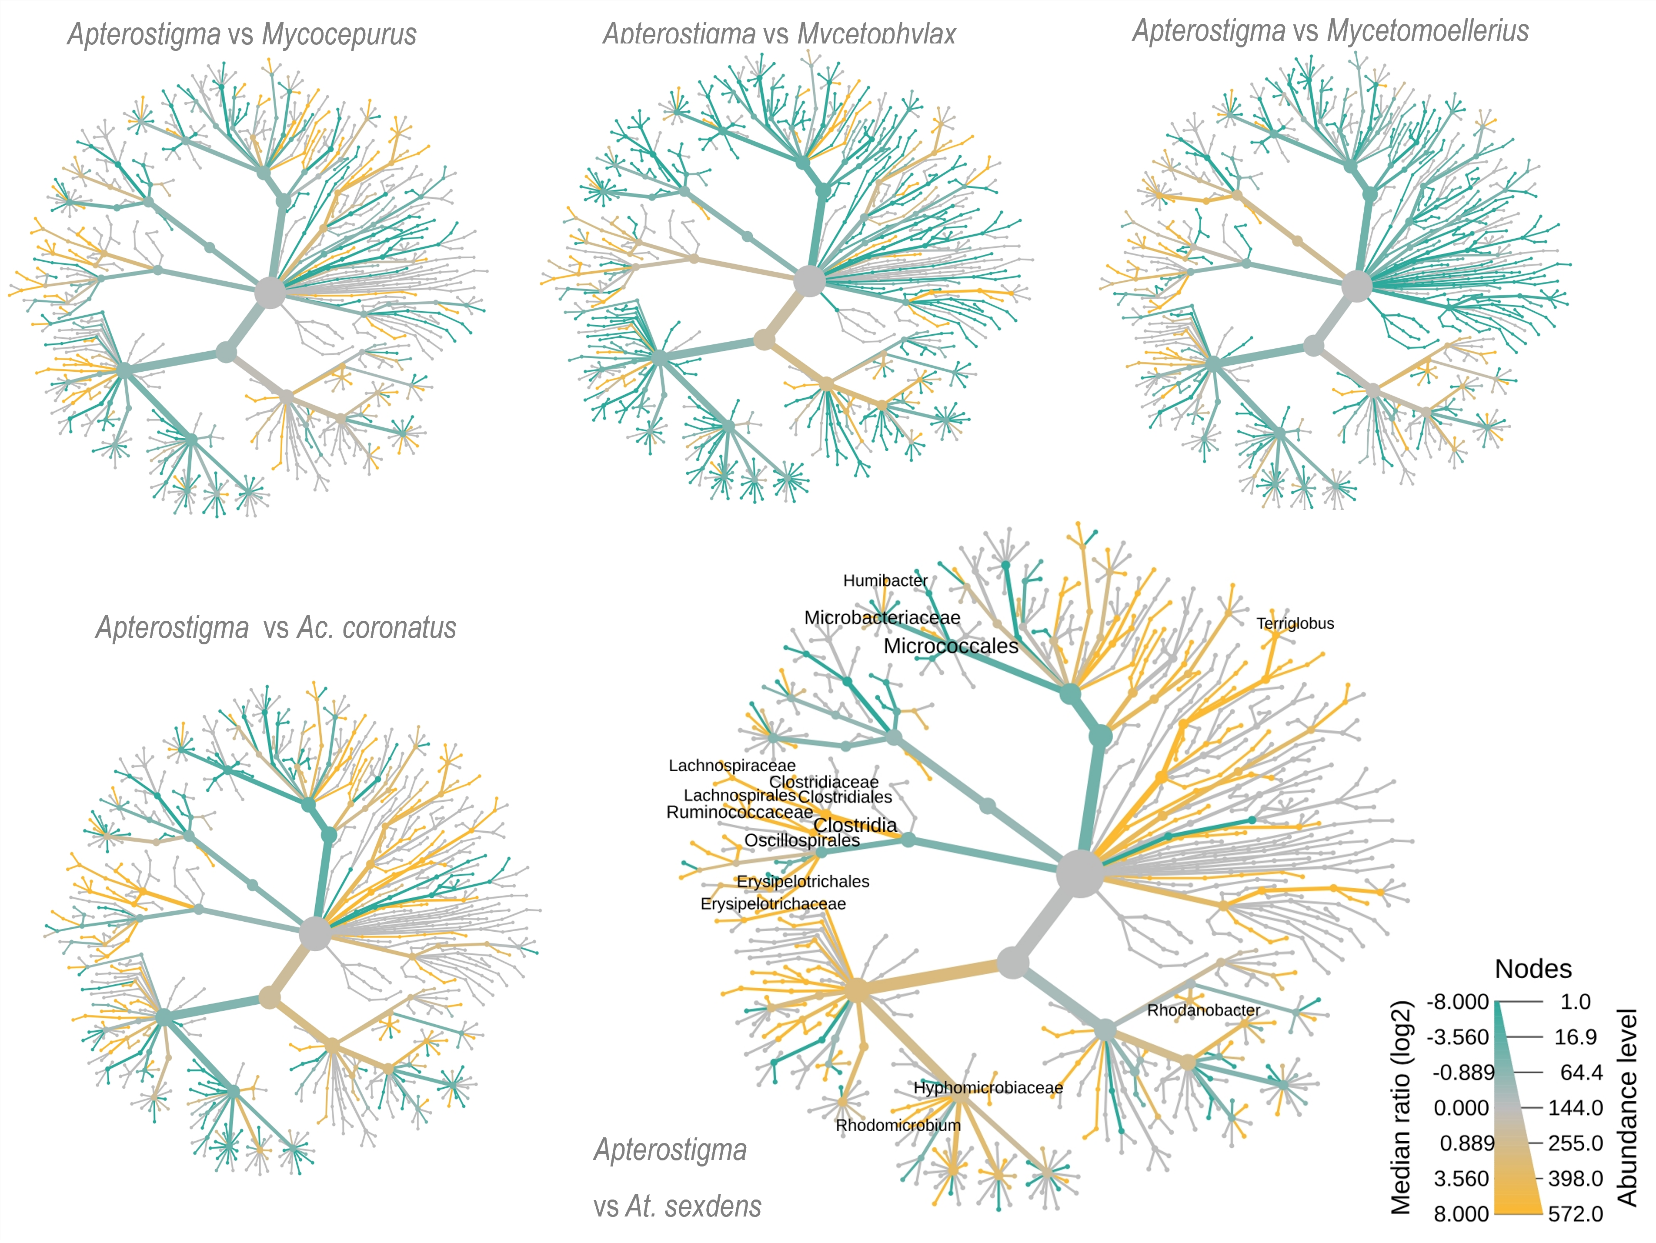
**Fig. S21** - Bacterial genus-level heat tree, comparing group-wise relative abundances (Wilcoxon test, *P <*0.05) between *Apterostigma* sp. and other attine in the waste. Bacterial genera are denoted (i.e., whose names are written) in the heat-tree only when significantly differ between attine being compared.


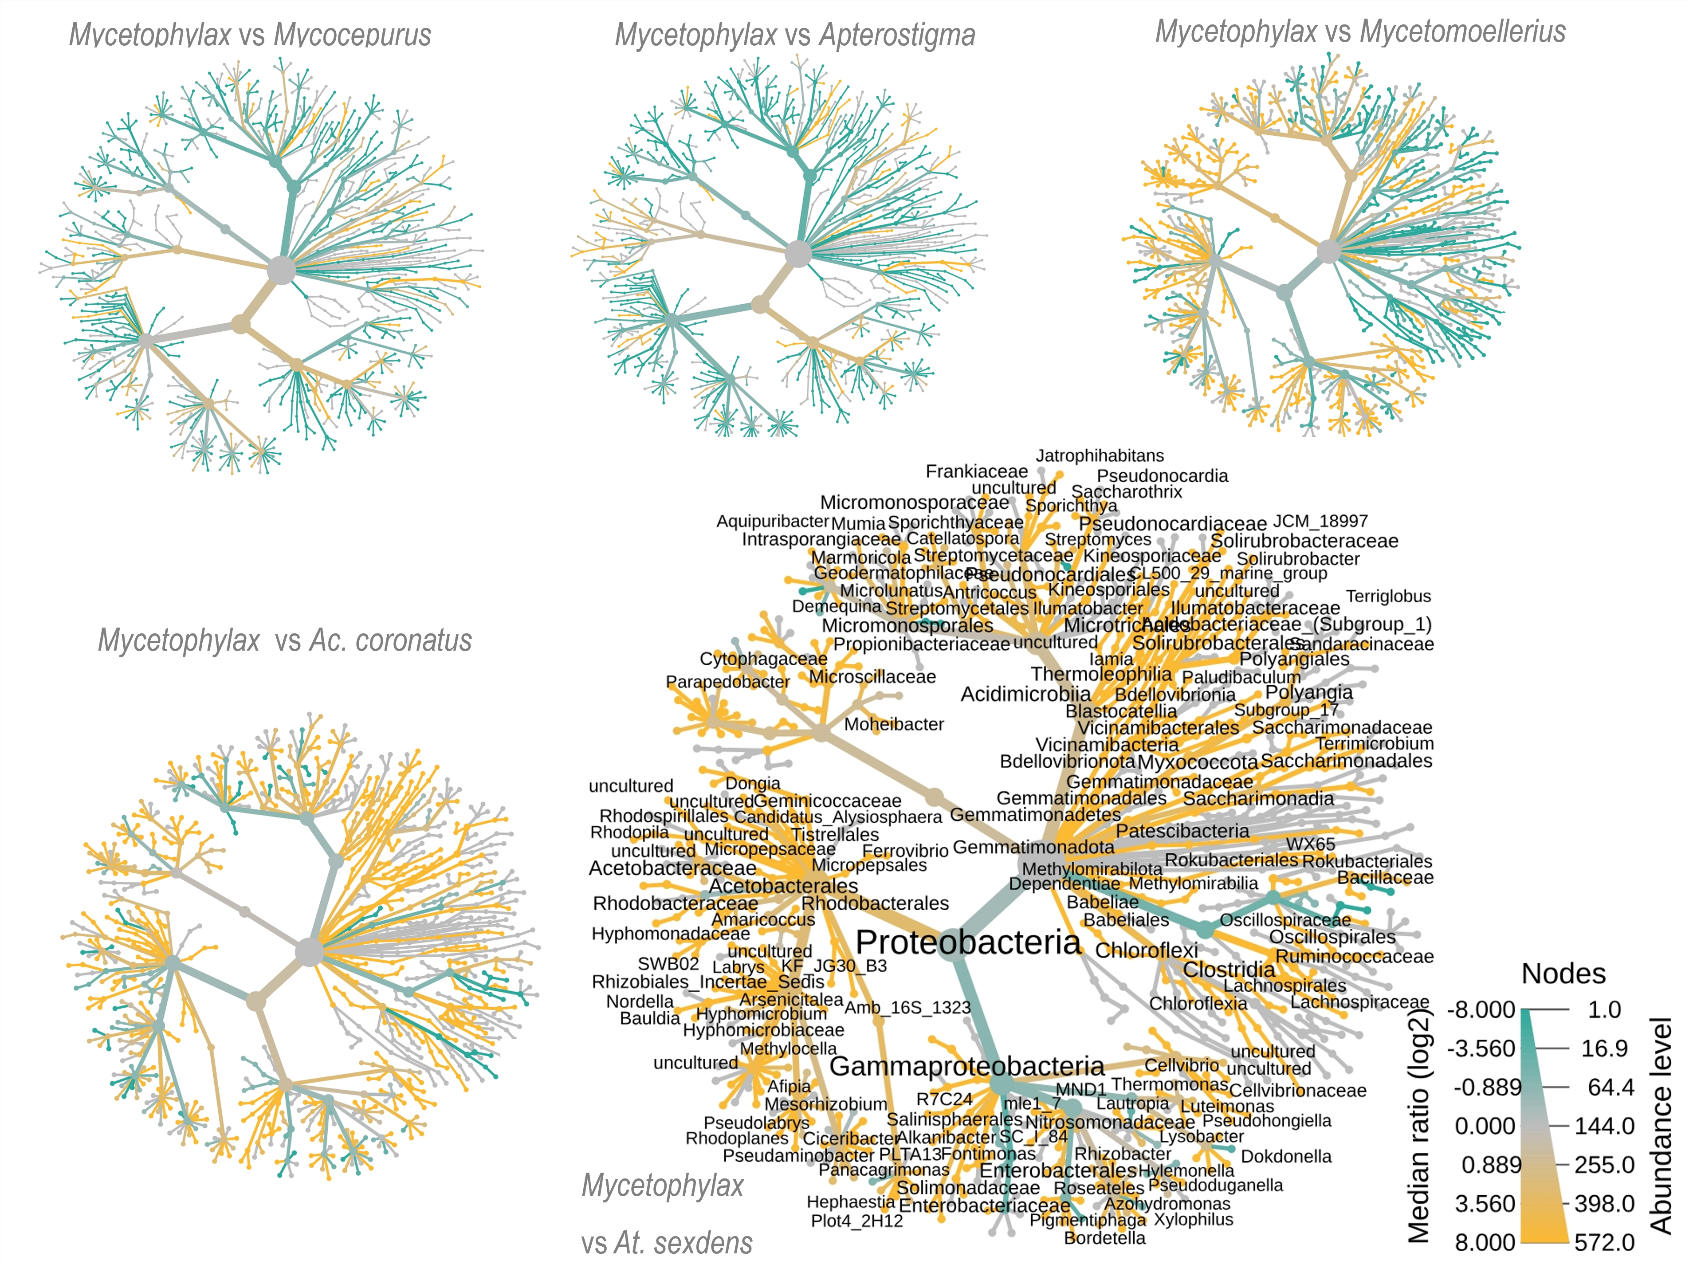
**Fig. S22** - Bacterial genus-level heat tree, comparing group-wise relative abundances (Wilcoxon test, *P <*0.05) between *Mycetophylax* sp. and other attine in the waste. Bacterial genera are denoted (i.e., whose names are written) in the heat-tree only when significantly differ between attine being compared.


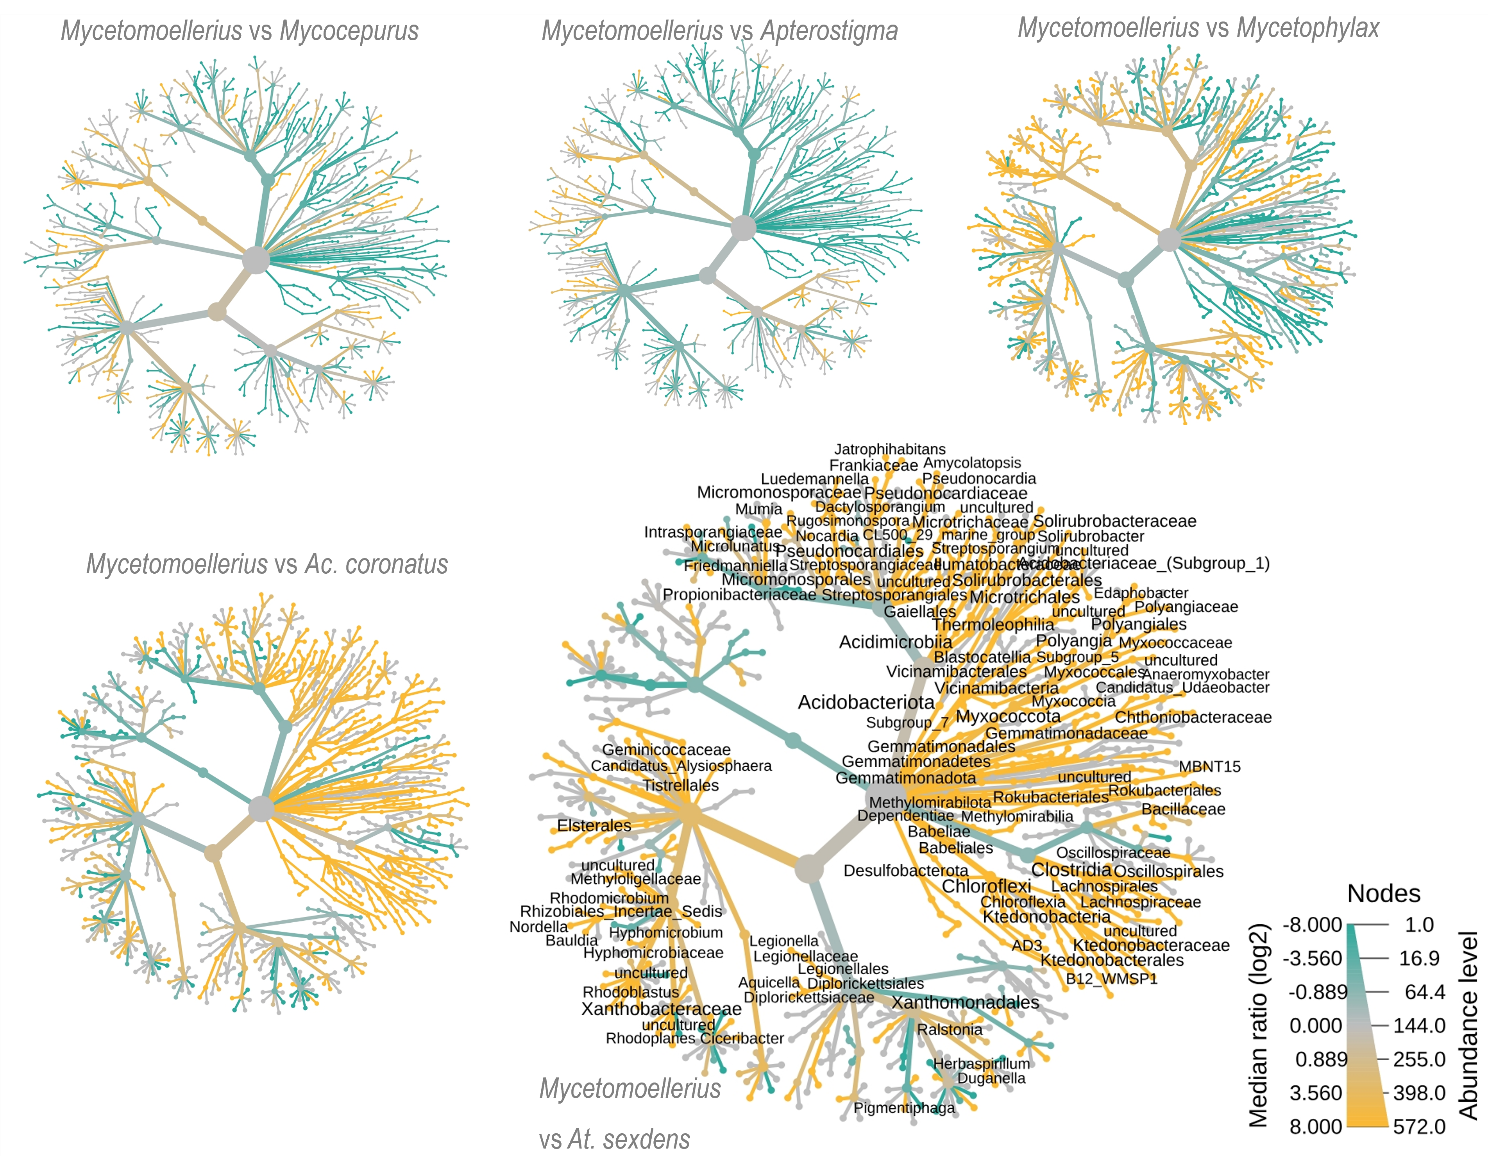
**Fig. S23** - Bacterial genus-level heat tree, comparing group-wise relative abundances (Wilcoxon test, *P <*0.05) between *Mycetomoellerius* sp. and other attine in the waste. Bacterial genera are denoted (i.e., whose names are written) in the heat-tree only when significantly differ between attine being compared.


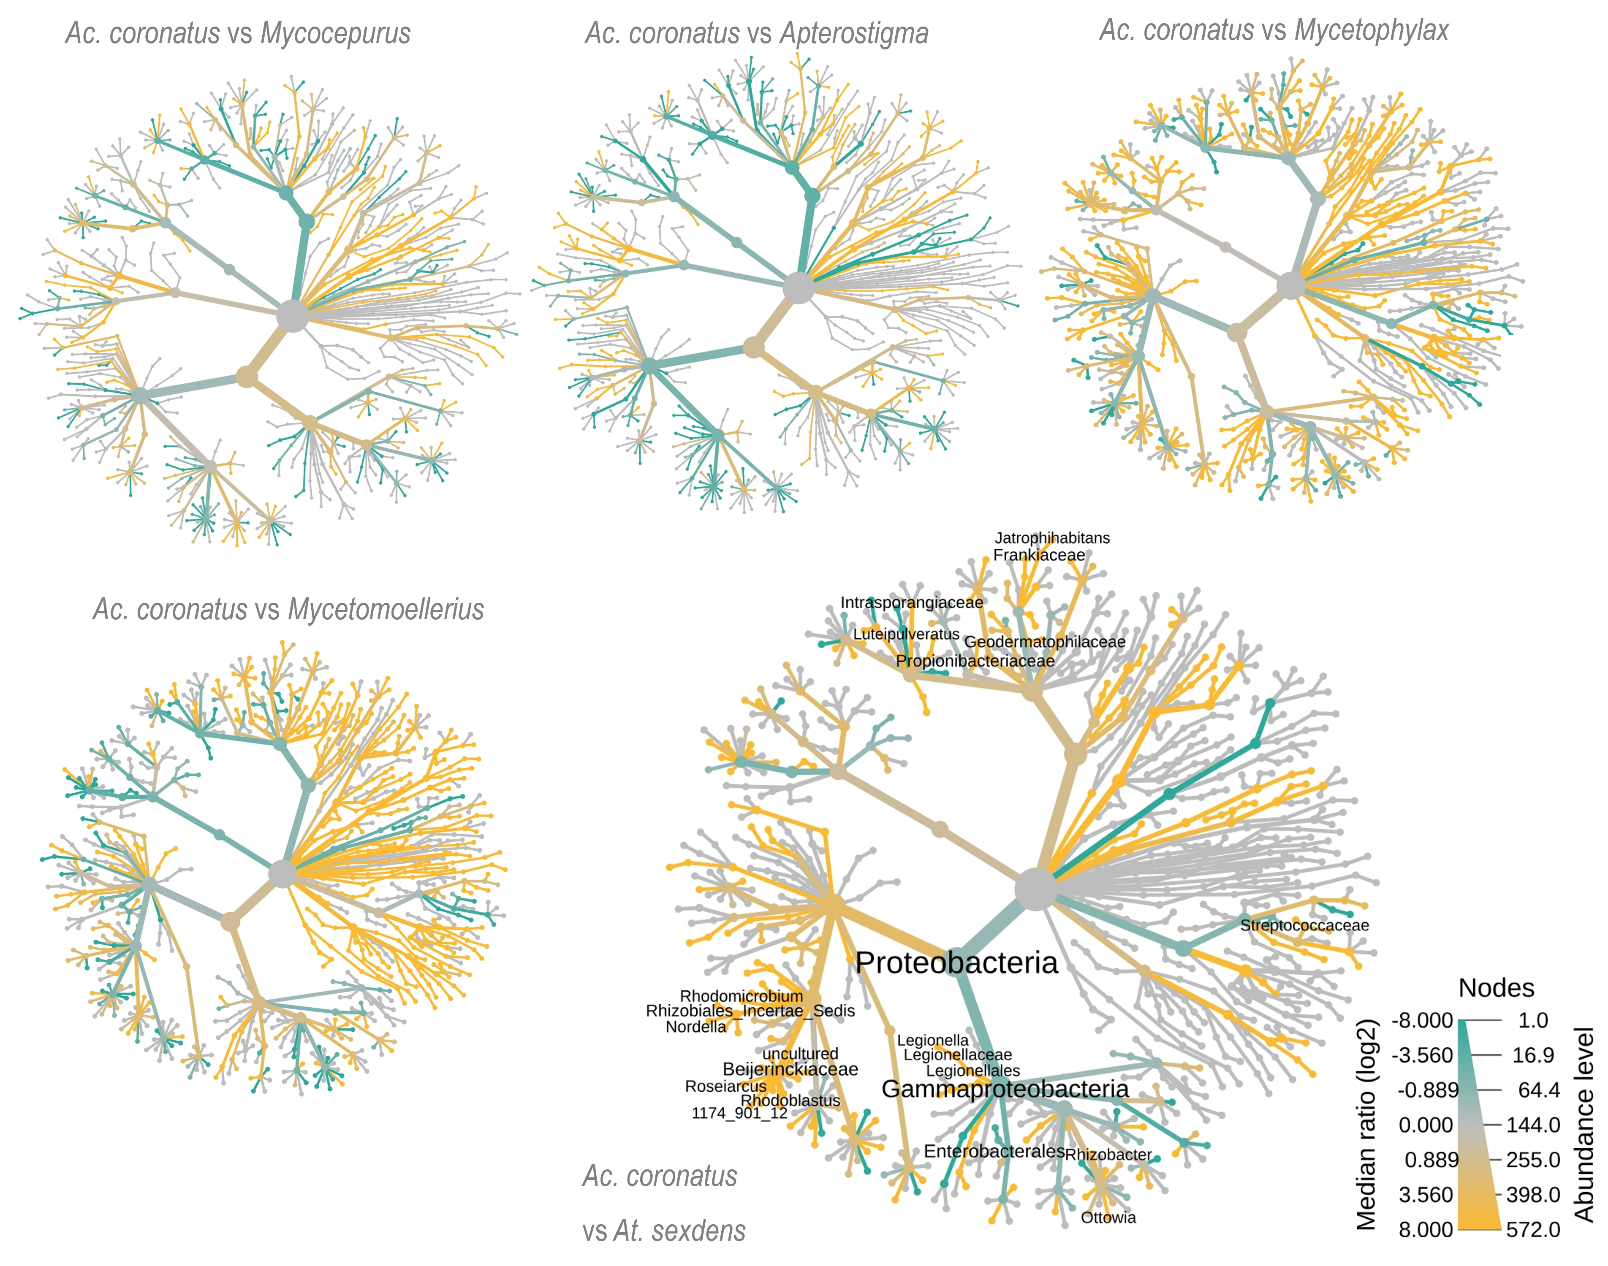
**Fig. S24** - Bacterial genus-level heat tree, comparing group-wise relative abundances (Wilcoxon test, *P <*0.05) between *Acromyrmex coronatus* and other attine in the waste. Bacterial genera are denoted (i.e., whose names are written) in the heat-tree only when significantly differ between attine being compared.

**Fig. S25** - Relative abundance of bacterial phylum and class in young gardens of different attine species.


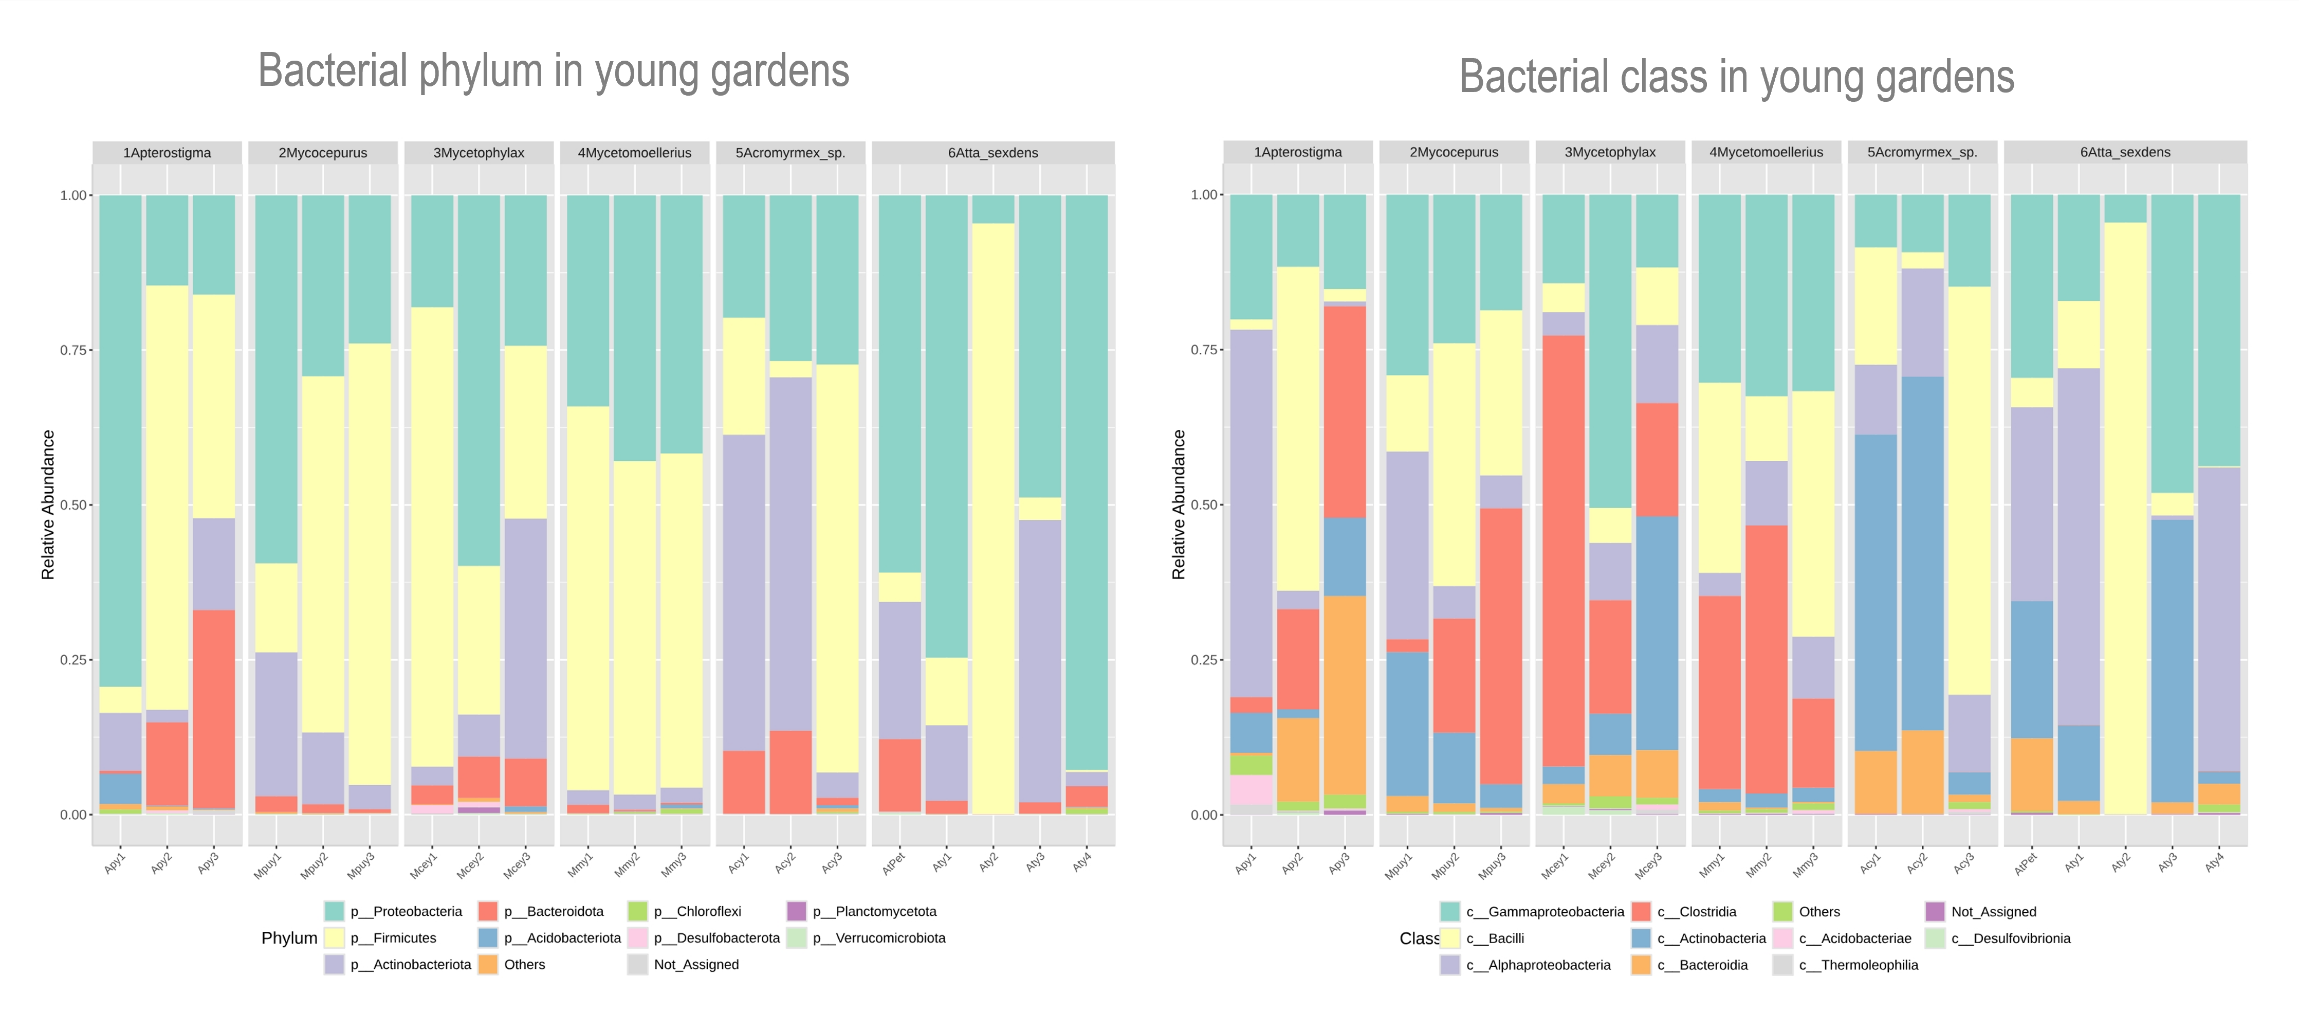


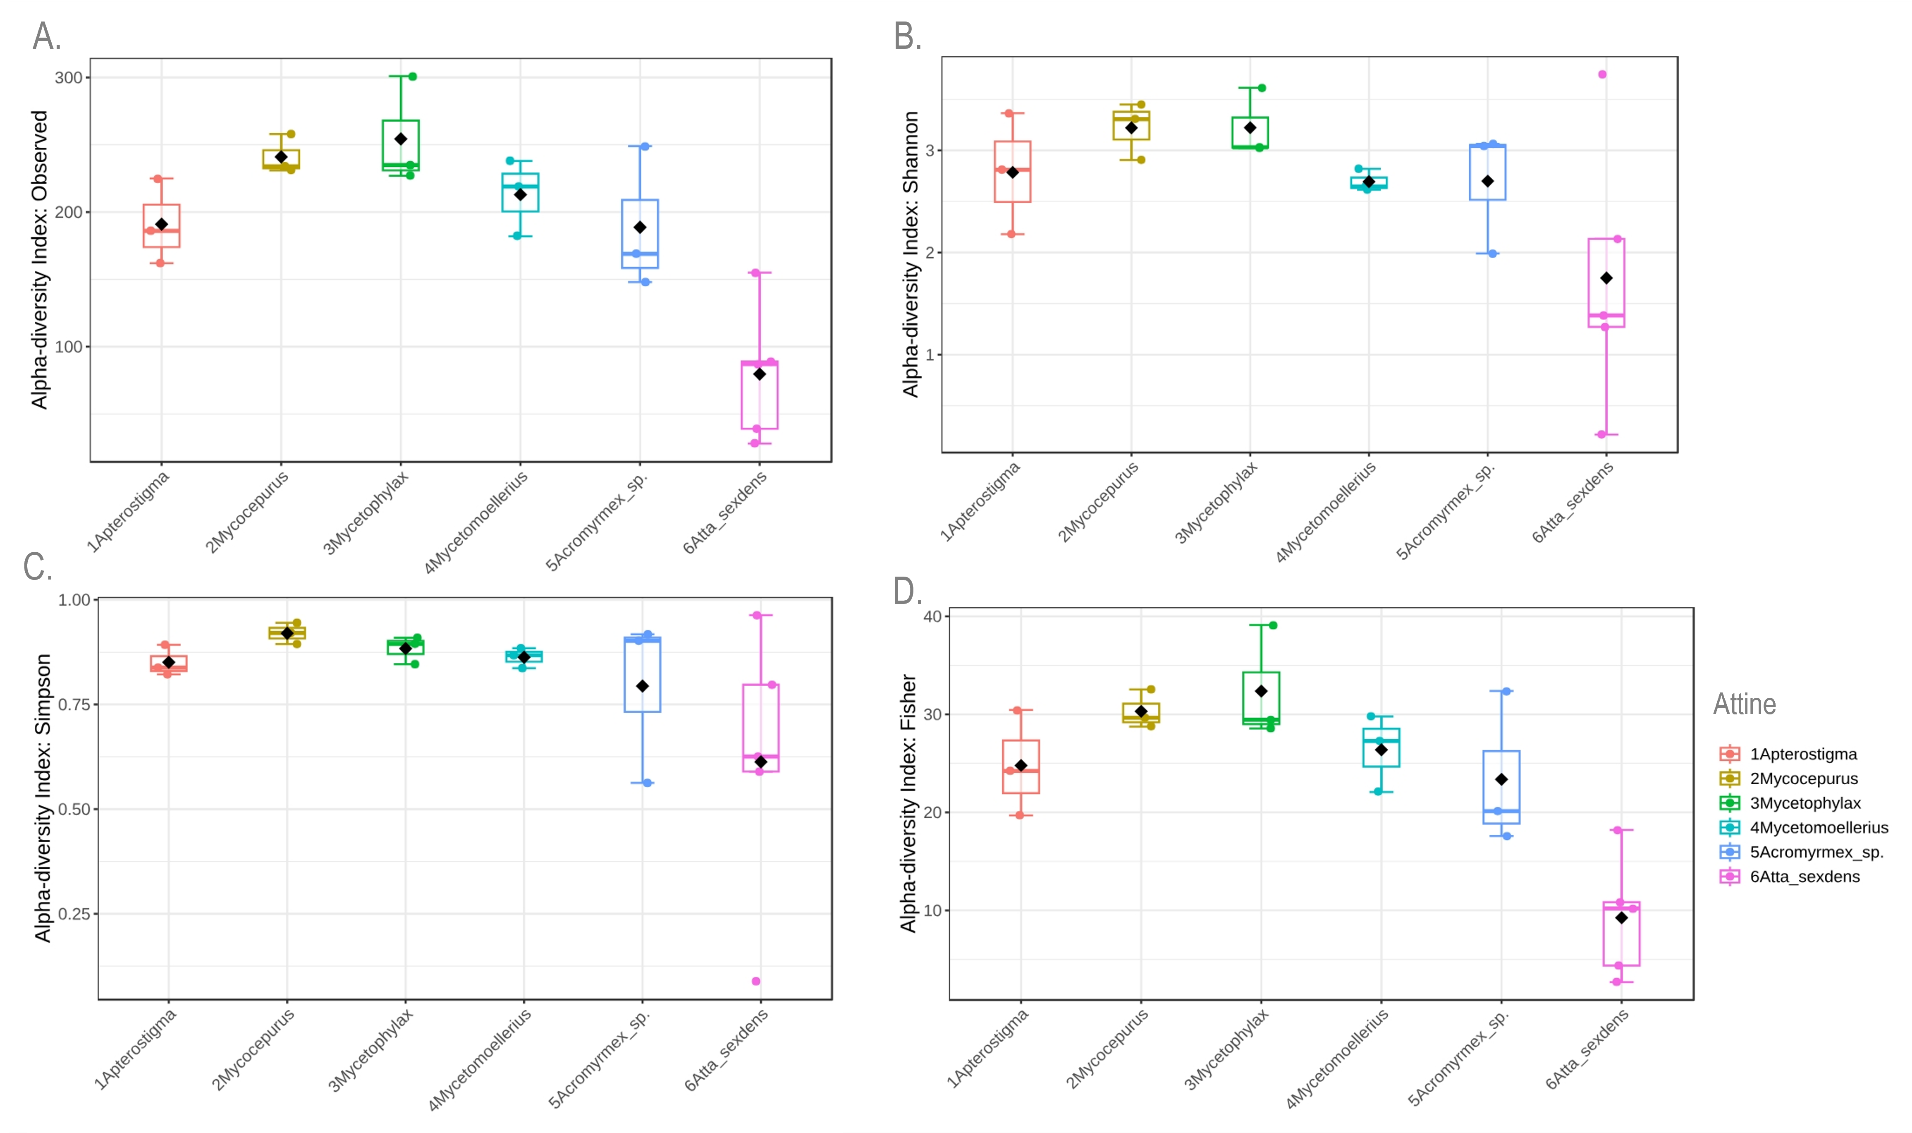
**Fig. S26** - Bacterial diversity of young gardens. Alpha-diversity indices were estimated at genus level, based on Observed Features (Richness), Shannon, Simpson, and Fisher. No significant differences were found by Mann-Whitney/Kruskal-Wallis, with the Wilcoxon test for post hoc pairwise comparisons.

**Fig. S27** - Relative abundance of bacterial phylum and class in old gardens of different attine species.


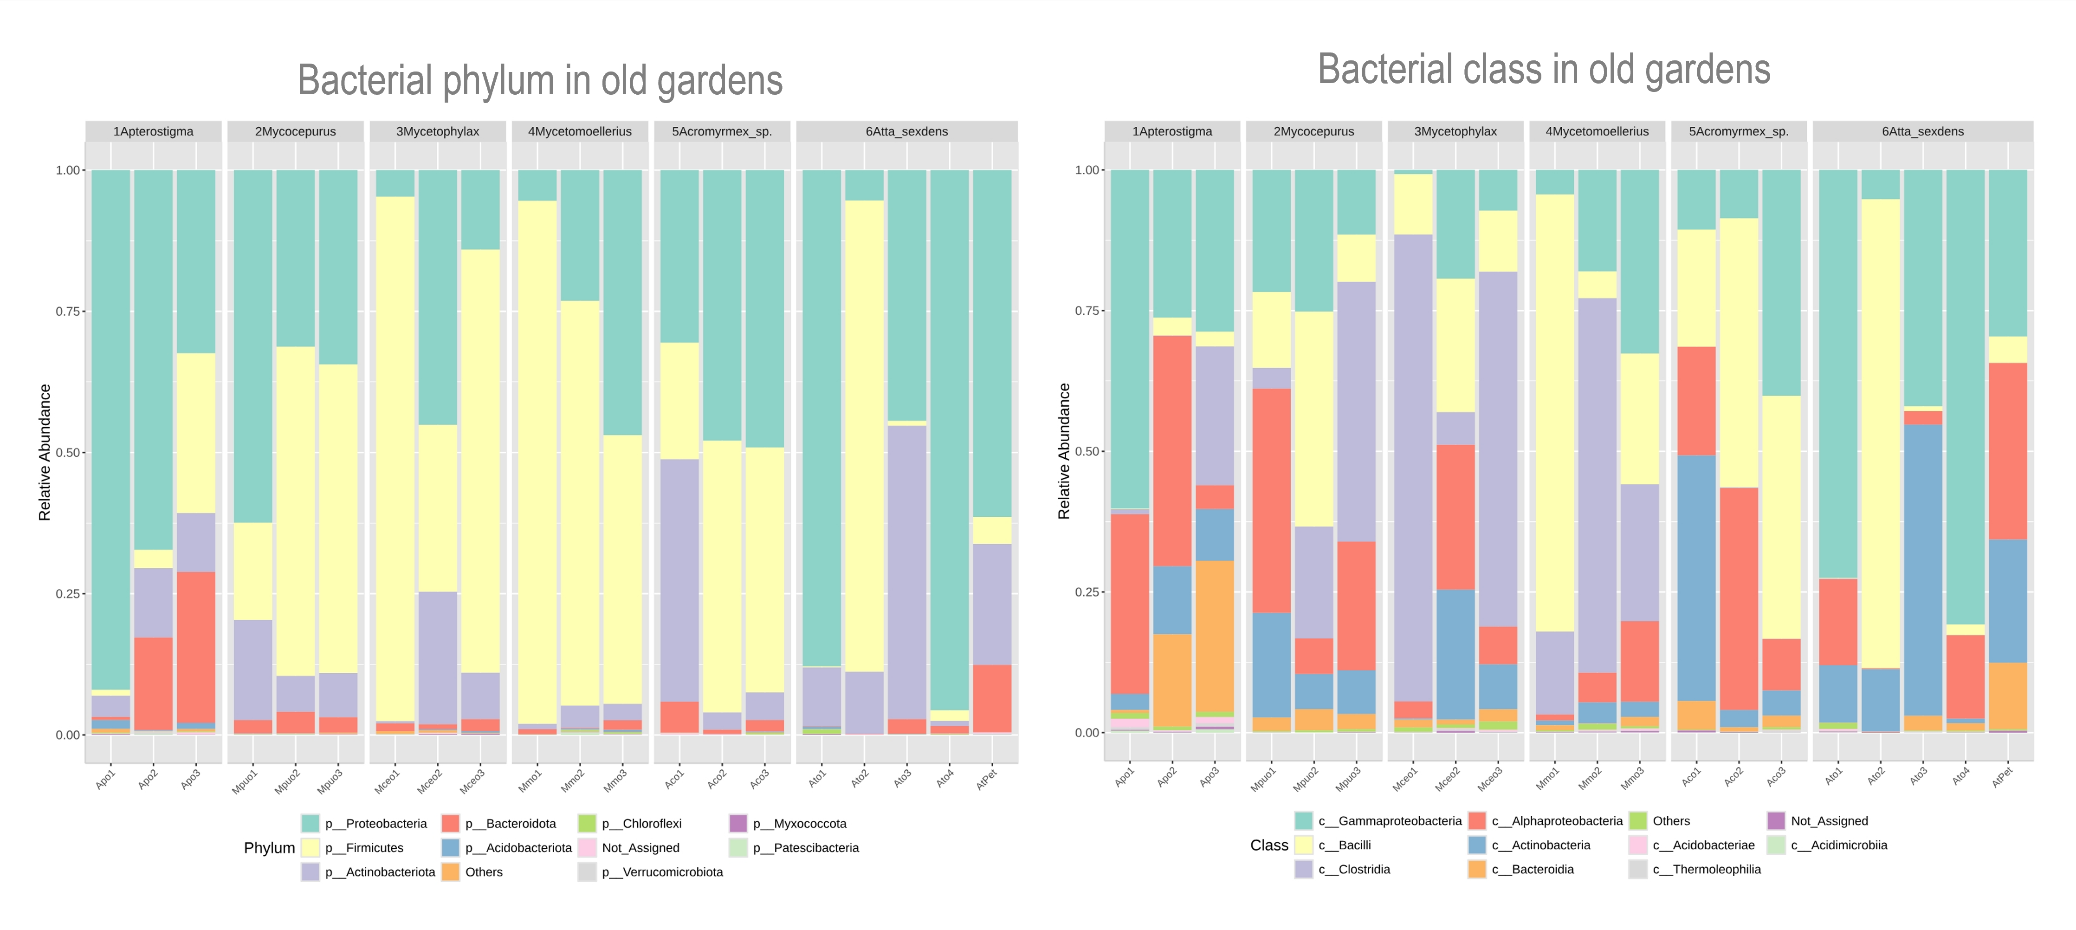


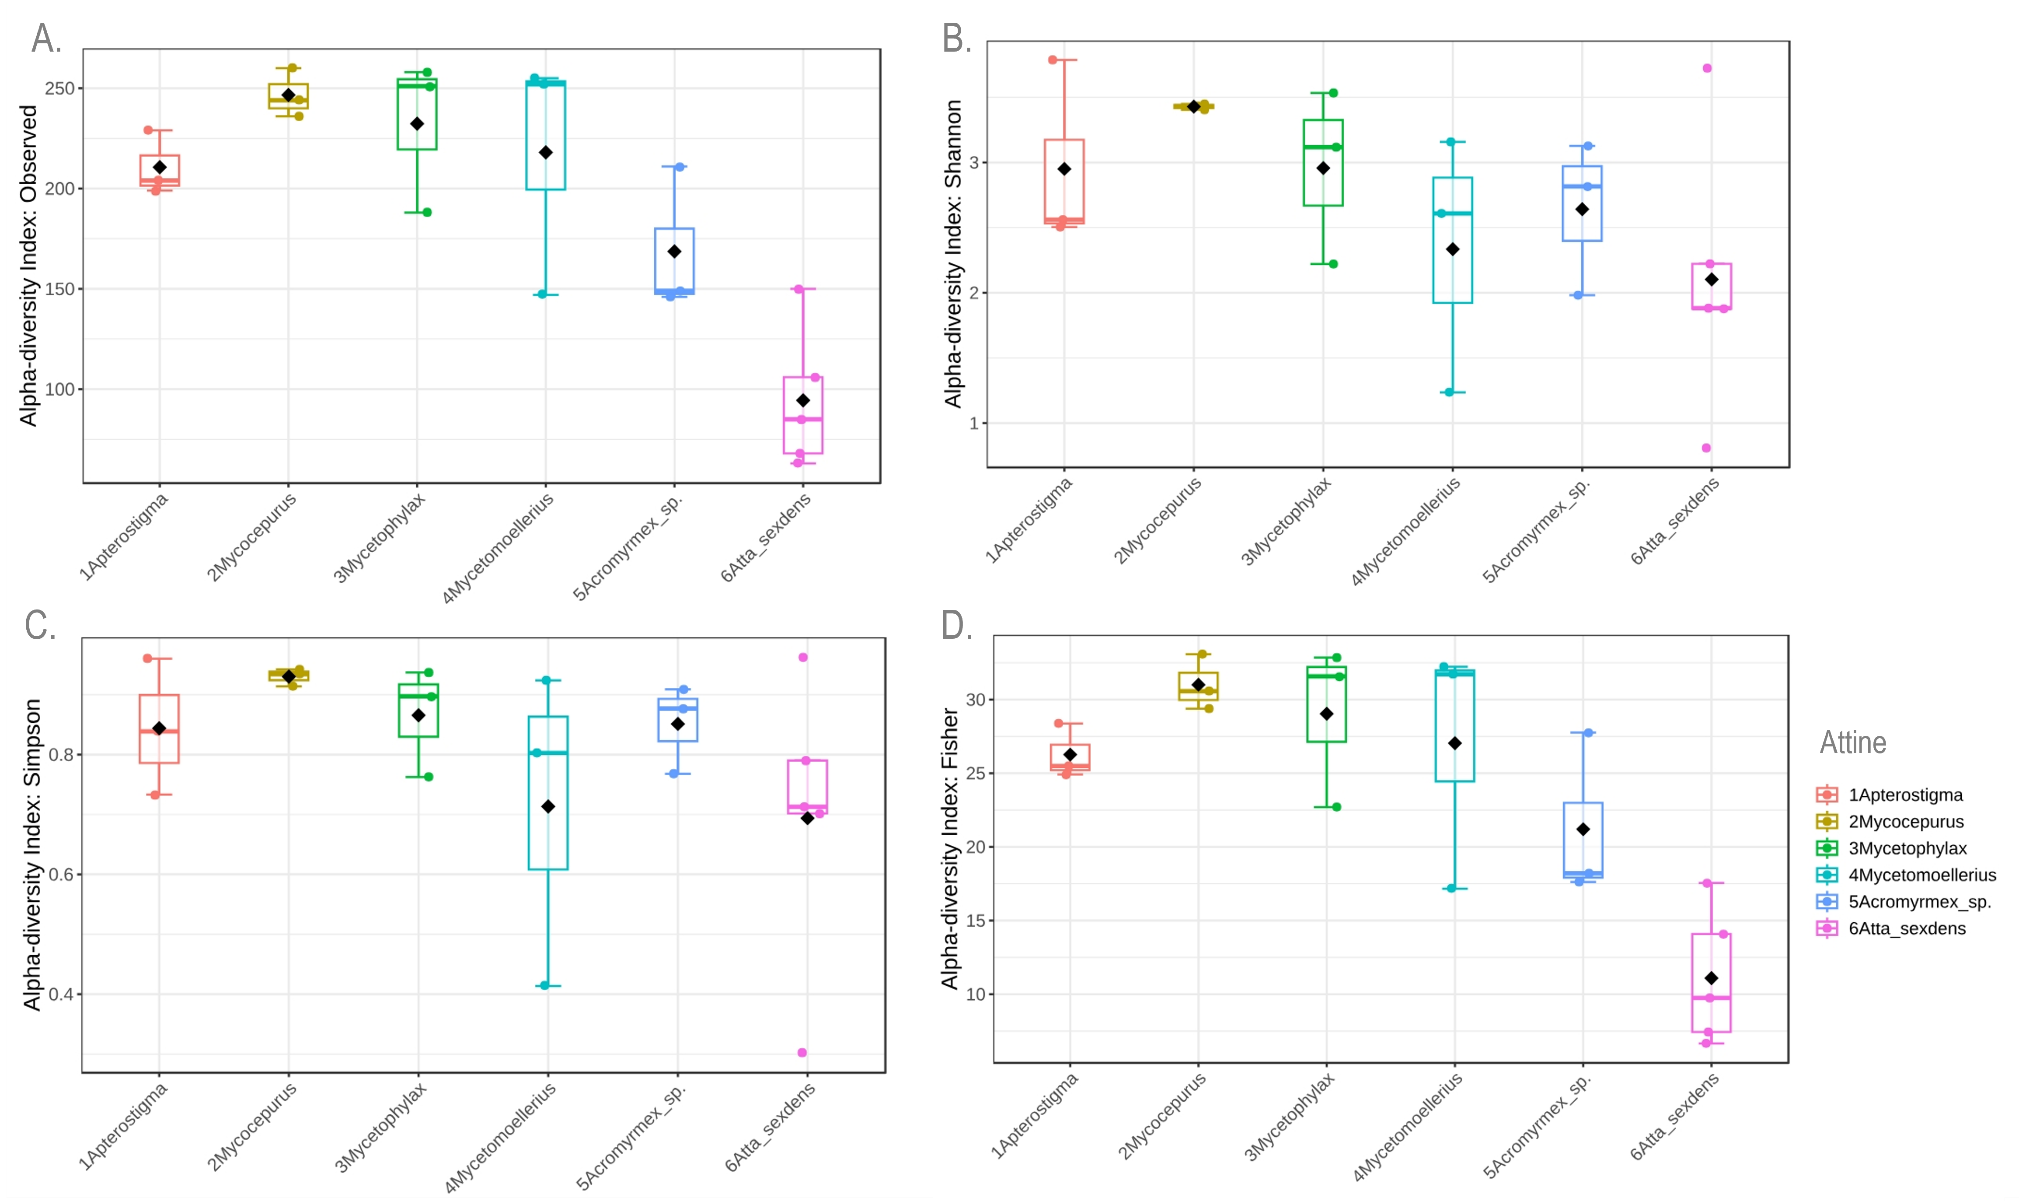
**Fig. S28** - Bacterial diversity of old gardens. Alpha-diversity indices were estimated at genus level, based on Observed Features (Richness), Shannon, Simpson, and Fisher. No significant differences were found by Mann-Whitney/Kruskal-Wallis, with the Wilcoxon test for post hoc pairwise comparisons.

**Fig. S29** - Relative abundance of bacterial phylum and class in the waste of different attine species.


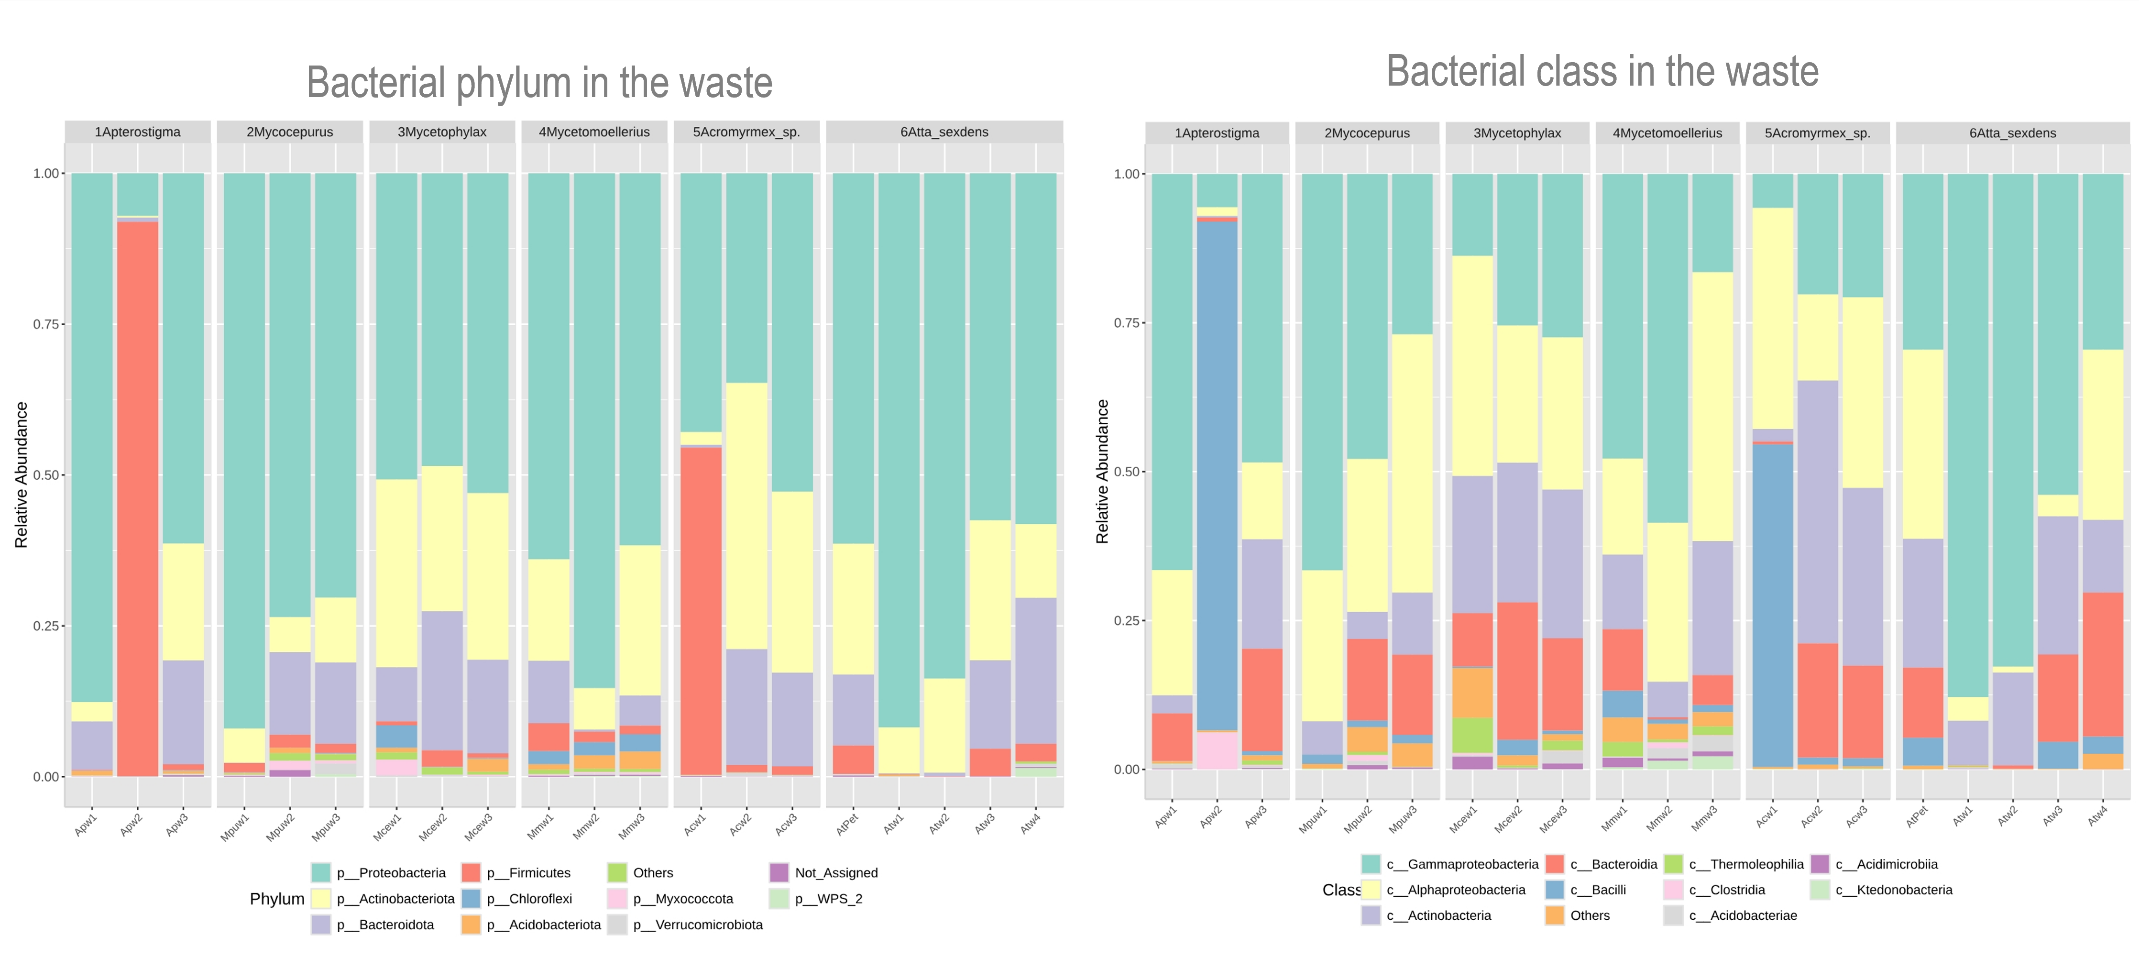


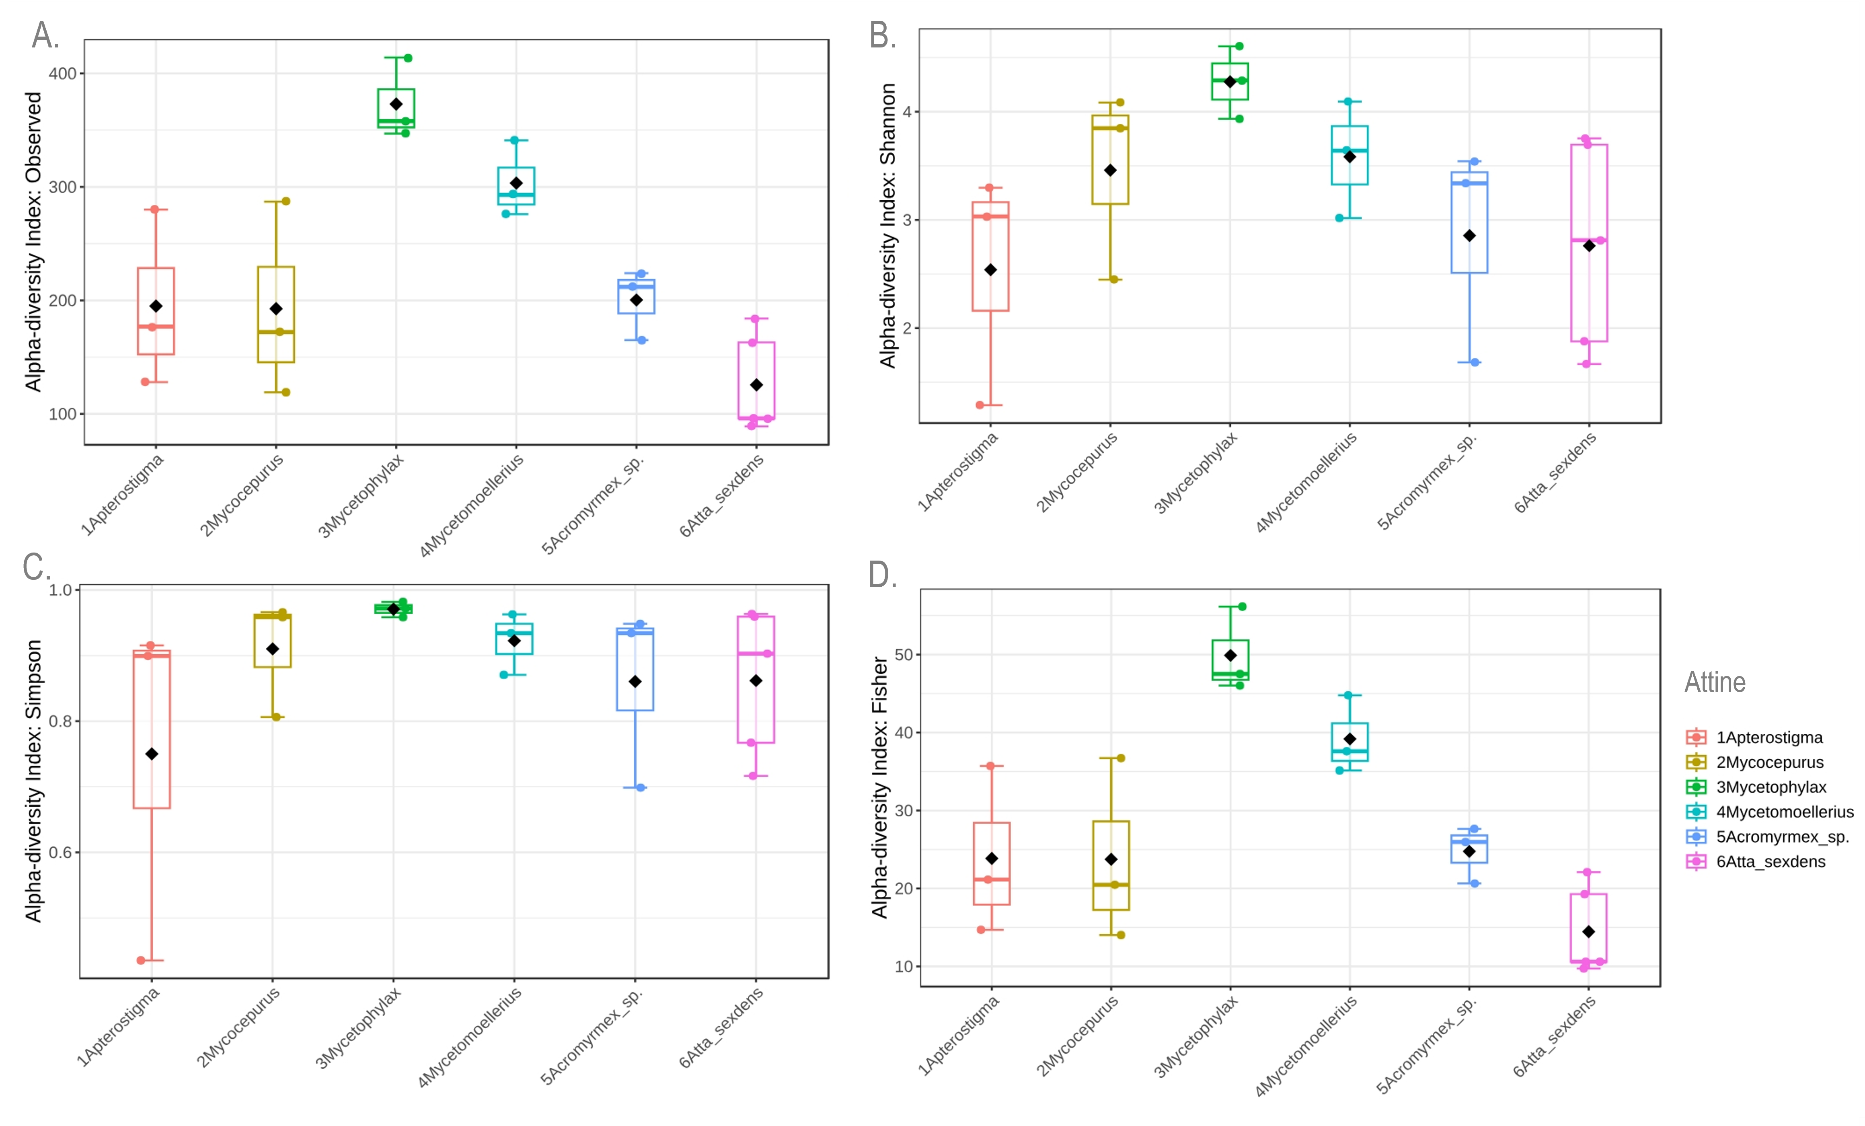
**Fig. S30** - Bacterial diversity of waste samples. Alpha-diversity indices were estimated at genus level, based on Observed Features (Richness), Shannon, Simpson, and Fisher. No significant differences were found by Mann-Whitney/Kruskal-Wallis, with the Wilcoxon test for post hoc pairwise comparisons.

**Fig. S31 - Garden structure, microbiota, and biofilm spatial distribution across attine fungiculture systems.** Garden features observed by SEM imaging along the experiment, including: hyphal density, presence of gongylidia, signs of substrate deterioration, substrate-colonizing microbiota, hyphae-colonizing microbiota, and presence of yeasts. SEM imaging allowed us to characterize the garden and waste of **A.** *Mycocepurus* sp.; **B.** *Apterostigma* sp.; **C.** *Mycetophylax* sp.; **D.** *Mycetomoellerius* sp.; **E.** *Ac. coronatus*; and **F.** *At. sexdens.* Illustrations by Mariana Barcoto.


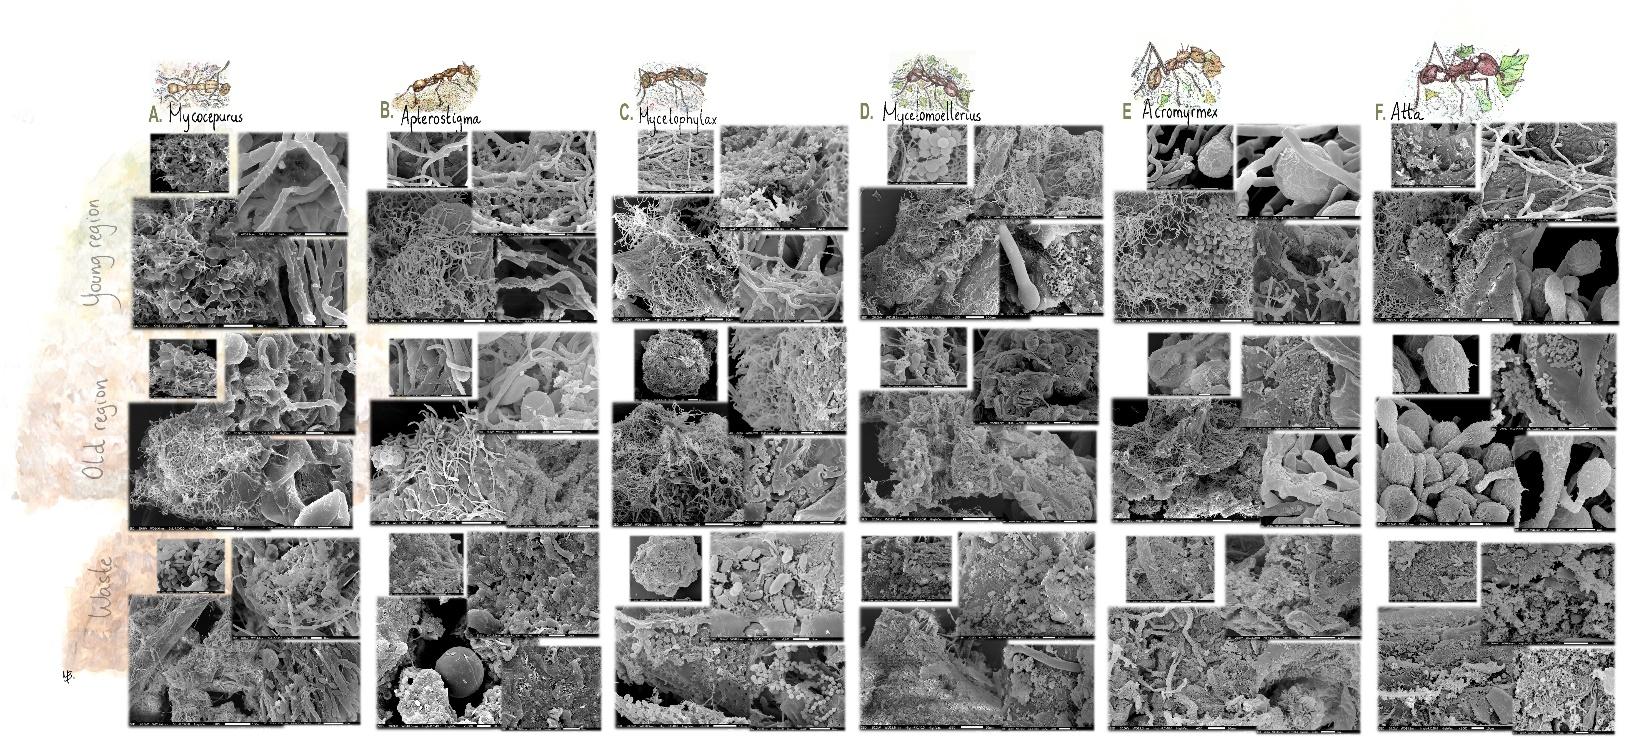

Supplement: Supplementary file 1 [file 0e31ea93bf2c82b664c2a527.docx]
